# Supplementary material for: Isobaric Tags for Relative and Absolute Quantitation (iTRAQ)-Based Proteomic Analysis of Hugan Qingzhi and Its Protective Properties against Free Fatty Acid-Induced L02 Hepatocyte Injury
Source: Front Pharmacol. 2017 Feb 28;8:99. doi: 10.3389/fphar.2017.00099 (PMC5329039; doi:10.3389/fphar.2017.00099)
Supplement: Supplementary file 3 [file Table_2.XLSX]

## Sheet: FFAvsC
Up-regulated
#Pathway	Count (151)	Pathway ID	Proteins	KOs
Metabolic pathways	30	ko01100	sp|P04843|RPN1_HUMAN;sp|P07954|FUMH_HUMAN;sp|P14927|QCR7_HUMAN;sp|P24752|THIL_HUMAN;sp|P36542|ATPG_HUMAN;sp|P51659|DHB4_HUMAN;sp|P55084|ECHB_HUMAN;sp|Q02218|ODO1_HUMAN;sp|Q16836|HCDH_HUMAN;sp|Q96HS1|PGAM5_HUMAN;tr|A0A024QZ30|A0A024QZ30_HUMAN;tr|A0A024R0C3|A0A024R0C3_HUMAN;tr|A0A024R5C5|A0A024R5C5_HUMAN;tr|A0A024R6C9|A0A024R6C9_HUMAN;tr|A0A024R6G4|A0A024R6G4_HUMAN;tr|A0A024R713|A0A024R713_HUMAN;tr…	K12666+K01679+K00417+K00626+K02136+K12405+K07509+K00164+K00022+K01834+K00234+K00323+K01958+K00658+K00140+K00382+K01077+K00161+K08764+K07508+K01681+K12667+K07515+K00261+K00088+K00128+K01948+K00249+K02132+K02133
Biosynthesis of secondary metabolites	16	ko01110	sp|P07954|FUMH_HUMAN;sp|P24752|THIL_HUMAN;sp|P55084|ECHB_HUMAN;sp|Q02218|ODO1_HUMAN;sp|Q16836|HCDH_HUMAN;sp|Q96HS1|PGAM5_HUMAN;tr|A0A024QZ30|A0A024QZ30_HUMAN;tr|A0A024R6C9|A0A024R6C9_HUMAN;tr|A0A024R713|A0A024R713_HUMAN;tr|A0A024RBX9|A0A024RBX9_HUMAN;tr|B2RB23|B2RB23_HUMAN;tr|B2RBW5|B2RBW5_HUMAN;tr|E9KL44|E9KL44_HUMAN;tr|H0Y4R1|H0Y4R1_HUMAN;tr|Q53FB6|Q53FB6_HUMAN;tr|Q5T4U5|Q5T4U5_HUMAN	K01679+K00626+K07509+K00164+K00022+K01834+K00234+K00658+K00382+K00161+K07508+K01681+K07515+K00088+K00128+K00249
Microbial metabolism in diverse environments	16	ko01120	sp|P07954|FUMH_HUMAN;sp|P24752|THIL_HUMAN;sp|P46087|NOP2_HUMAN;sp|P55084|ECHB_HUMAN;sp|Q02218|ODO1_HUMAN;sp|Q16836|HCDH_HUMAN;sp|Q96HS1|PGAM5_HUMAN;tr|A0A024R5C5|A0A024R5C5_HUMAN;tr|A0A024R6C9|A0A024R6C9_HUMAN;tr|A0A024R713|A0A024R713_HUMAN;tr|A0A024RAG0|A0A024RAG0_HUMAN;tr|A0A024RBX9|A0A024RBX9_HUMAN;tr|B2RB23|B2RB23_HUMAN;tr|B2RBW5|B2RBW5_HUMAN;tr|E9KL44|E9KL44_HUMAN;tr|Q53FB6|Q53FB6_HUMAN	K01679+K00626+K00599+K07509+K00164+K00022+K01834+K01958+K00658+K00382+K01077+K00161+K07508+K01681+K07515+K00128
Protein processing in endoplasmic reticulum	15	ko04141	sp|P04843|RPN1_HUMAN;sp|P27824|CALX_HUMAN;sp|Q8NBS9|TXND5_HUMAN;tr|A0A024R663|A0A024R663_HUMAN;tr|A0A024R8S5|A0A024R8S5_HUMAN;tr|A0A024RBH2|A0A024RBH2_HUMAN;tr|A0A090N8Y2|A0A090N8Y2_HUMAN;tr|A0A0A0MRV0|A0A0A0MRV0_HUMAN;tr|A8KA82|A8KA82_HUMAN;tr|B2RE46|B2RE46_HUMAN;tr|K7ELL7|K7ELL7_HUMAN;tr|Q53HT6|Q53HT6_HUMAN;tr|V9HVY3|V9HVY3_HUMAN;tr|V9HW88|V9HW88_HUMAN;tr|V9HWB4|V9HWB4_HUMAN	K12666+K08054+K13984+K14000+K09580+K13999+K09582+K09523+K12667+K08288+K14009+K08056+K08057+K09490
Huntington's disease	11	ko05016	sp|O00291|HIP1_HUMAN;sp|P14927|QCR7_HUMAN;sp|P21796|VDAC1_HUMAN;sp|P36542|ATPG_HUMAN;sp|Q00610|CLH1_HUMAN;sp|Q9Y277|VDAC3_HUMAN;tr|A0A024QZ30|A0A024QZ30_HUMAN;tr|A0A024R7S3|A0A024R7S3_HUMAN;tr|G4XXL9|G4XXL9_HUMAN;tr|V9HW26|V9HW26_HUMAN;tr|V9HW31|V9HW31_HUMAN	K04559+K00417+K05862+K02136+K04646+K00234+K04645+K08738+K02132+K02133
Valine, leucine and isoleucine degradation	10	ko00280	sp|P24752|THIL_HUMAN;sp|P55084|ECHB_HUMAN;sp|Q16836|HCDH_HUMAN;tr|A0A024R040|A0A024R040_HUMAN;tr|A0A024R6G4|A0A024R6G4_HUMAN;tr|A0A024R713|A0A024R713_HUMAN;tr|B2RB23|B2RB23_HUMAN;tr|E9KL44|E9KL44_HUMAN;tr|Q53FB6|Q53FB6_HUMAN;tr|Q5T4U5|Q5T4U5_HUMAN	K00626+K07509+K00022+K01027+K00140+K00382+K07508+K07515+K00128+K00249
Spliceosome	9	ko03040	sp|O43143|DHX15_HUMAN;sp|O94906|PRP6_HUMAN;sp|P38159|RBMX_HUMAN;sp|P52272|HNRPM_HUMAN;tr|B2R5W2|B2R5W2_HUMAN;tr|B4DLR3|B4DLR3_HUMAN;tr|B4DSH1|B4DSH1_HUMAN;tr|Q59GA1|Q59GA1_HUMAN;tr|Q6I9S2|Q6I9S2_HUMAN	K12820+K12855+K12885+K12887+K12884+K12888+K12860+K12897+K06063
Parkinson's disease	8	ko05012	sp|P14927|QCR7_HUMAN;sp|P21796|VDAC1_HUMAN;sp|P36542|ATPG_HUMAN;sp|Q9Y277|VDAC3_HUMAN;tr|A0A024QZ30|A0A024QZ30_HUMAN;tr|G4XXL9|G4XXL9_HUMAN;tr|V9HW26|V9HW26_HUMAN;tr|V9HW31|V9HW31_HUMAN	K00417+K05862+K02136+K00234+K08738+K02132+K02133
Fatty acid metabolism	8	ko00071	sp|P24752|THIL_HUMAN;sp|P55084|ECHB_HUMAN;sp|Q16836|HCDH_HUMAN;tr|A0A024R5F4|A0A024R5F4_HUMAN;tr|B2RB23|B2RB23_HUMAN;tr|E9KL44|E9KL44_HUMAN;tr|Q53FB6|Q53FB6_HUMAN;tr|Q5T4U5|Q5T4U5_HUMAN	K00626+K07509+K00022+K08765+K07508+K07515+K00128+K00249
Citrate cycle (TCA cycle)	8	ko00020	sp|P07954|FUMH_HUMAN;sp|Q02218|ODO1_HUMAN;tr|A0A024QZ30|A0A024QZ30_HUMAN;tr|A0A024R5C5|A0A024R5C5_HUMAN;tr|A0A024R6C9|A0A024R6C9_HUMAN;tr|A0A024R713|A0A024R713_HUMAN;tr|A0A024RBX9|A0A024RBX9_HUMAN;tr|B2RBW5|B2RBW5_HUMAN	K01679+K00164+K00234+K01958+K00658+K00382+K00161+K01681
Alzheimer's disease	7	ko05010	sp|P14927|QCR7_HUMAN;sp|P16615|AT2A2_HUMAN;sp|P36542|ATPG_HUMAN;tr|A0A024QZ30|A0A024QZ30_HUMAN;tr|G4XXL9|G4XXL9_HUMAN;tr|V9HW26|V9HW26_HUMAN;tr|V9HW31|V9HW31_HUMAN	K00417+K05853+K02136+K00234+K08738+K02132+K02133
Ribosome	7	ko03010	sp|P23396|RS3_HUMAN;sp|P61254|RL26_HUMAN;sp|P62081|RS7_HUMAN;sp|P62750|RL23A_HUMAN;sp|P62917|RL8_HUMAN;tr|A0A0A6YYL6|A0A0A6YYL6_HUMAN;tr|B2R4C1|B2R4C1_HUMAN	K02985+K02898+K02993+K02893+K02938+K02880+K02910
Lysine degradation	6	ko00310	sp|P24752|THIL_HUMAN;sp|Q02218|ODO1_HUMAN;sp|Q16836|HCDH_HUMAN;tr|A0A024R6C9|A0A024R6C9_HUMAN;tr|E9KL44|E9KL44_HUMAN;tr|Q53FB6|Q53FB6_HUMAN	K00626+K00164+K00022+K00658+K07515+K00128
PPAR signaling pathway	5	ko03320	sp|O60664|PLIN3_HUMAN;tr|A0A024R5F4|A0A024R5F4_HUMAN;tr|B2R761|B2R761_HUMAN;tr|Q5T4U5|Q5T4U5_HUMAN;tr|Q6FHZ7|Q6FHZ7_HUMAN	K08768+K08765+K08764+K00249
Oxidative phosphorylation	5	ko00190	sp|P14927|QCR7_HUMAN;sp|P36542|ATPG_HUMAN;tr|A0A024QZ30|A0A024QZ30_HUMAN;tr|V9HW26|V9HW26_HUMAN;tr|V9HW31|V9HW31_HUMAN	K00417+K02136+K00234+K02132+K02133
Butanoate metabolism	5	ko00650	sp|P24752|THIL_HUMAN;sp|Q16836|HCDH_HUMAN;tr|A0A024R040|A0A024R040_HUMAN;tr|A0A024RBX9|A0A024RBX9_HUMAN;tr|E9KL44|E9KL44_HUMAN	K00626+K00022+K01027+K00161+K07515
Propanoate metabolism	5	ko00640	sp|P24752|THIL_HUMAN;tr|A0A024R6G4|A0A024R6G4_HUMAN;tr|E9KL44|E9KL44_HUMAN;tr|Q53FB6|Q53FB6_HUMAN;tr|Q5T4U5|Q5T4U5_HUMAN	K00626+K00140+K07515+K00128+K00249
Tryptophan metabolism	5	ko00380	sp|P24752|THIL_HUMAN;sp|Q02218|ODO1_HUMAN;sp|Q16836|HCDH_HUMAN;tr|E9KL44|E9KL44_HUMAN;tr|Q53FB6|Q53FB6_HUMAN	K00626+K00164+K00022+K07515+K00128
Antigen processing and presentation	5	ko04612	sp|P27824|CALX_HUMAN;sp|P61769|B2MG_HUMAN;tr|Q9MYC0|Q9MYC0_HUMAN;tr|V9HVY3|V9HVY3_HUMAN;tr|V9HW88|V9HW88_HUMAN	K08054+K08055+K06751+K08056+K08057
Pyruvate metabolism	5	ko00620	sp|P24752|THIL_HUMAN;tr|A0A024R5C5|A0A024R5C5_HUMAN;tr|A0A024R713|A0A024R713_HUMAN;tr|A0A024RBX9|A0A024RBX9_HUMAN;tr|Q53FB6|Q53FB6_HUMAN	K00626+K01958+K00382+K00161+K00128
Benzoate degradation	4	ko00362	sp|P24752|THIL_HUMAN;sp|P55084|ECHB_HUMAN;tr|B2RB23|B2RB23_HUMAN;tr|E9KL44|E9KL44_HUMAN	K00626+K07509+K07508+K07515
Endocytosis	4	ko04144	sp|Q00610|CLH1_HUMAN;sp|Q15075|EEA1_HUMAN;tr|A0A024R7S3|A0A024R7S3_HUMAN;tr|Q9MYC0|Q9MYC0_HUMAN	K04646+K12478+K04645+K06751
RNA transport	4	ko03013	sp|P12270|TPR_HUMAN;sp|P49792|RBP2_HUMAN;sp|Q9H307|PININ_HUMAN;tr|E7EX17|E7EX17_HUMAN	K09291+K12172+K13114+K03258
Glycolysis / Gluconeogenesis	4	ko00010	sp|Q96HS1|PGAM5_HUMAN;tr|A0A024R713|A0A024R713_HUMAN;tr|A0A024RBX9|A0A024RBX9_HUMAN;tr|Q53FB6|Q53FB6_HUMAN	K01834+K00382+K00161+K00128
Fatty acid elongation in mitochondria	4	ko00062	sp|P55084|ECHB_HUMAN;sp|Q16836|HCDH_HUMAN;tr|B2RB23|B2RB23_HUMAN;tr|E9KL44|E9KL44_HUMAN	K07509+K00022+K07508+K07515
Pathways in cancer	4	ko05200	sp|P07954|FUMH_HUMAN;sp|P12270|TPR_HUMAN;tr|B2RDE1|B2RDE1_HUMAN;tr|G4XXL9|G4XXL9_HUMAN	K01679+K09291+K09290+K08738
Phagosome	4	ko04145	sp|P27824|CALX_HUMAN;sp|Q15075|EEA1_HUMAN;tr|Q9MYC0|Q9MYC0_HUMAN;tr|V9HW88|V9HW88_HUMAN	K08054+K12478+K06751+K08057
Peroxisome	3	ko04146	sp|P51659|DHB4_HUMAN;sp|Q96HS1|PGAM5_HUMAN;tr|B2R761|B2R761_HUMAN	K12405+K13347+K08764
Viral myocarditis	3	ko05416	tr|A0A024R1N1|A0A024R1N1_HUMAN;tr|G4XXL9|G4XXL9_HUMAN;tr|Q9MYC0|Q9MYC0_HUMAN	K10352+K08738+K06751
Calcium signaling pathway	3	ko04020	sp|P16615|AT2A2_HUMAN;sp|P21796|VDAC1_HUMAN;sp|Q9Y277|VDAC3_HUMAN	K05853+K05862
Arginine and proline metabolism	3	ko00330	tr|E9KL48|E9KL48_HUMAN;tr|Q53FB6|Q53FB6_HUMAN;tr|Q5R210|Q5R210_HUMAN	K00261+K00128+K01948
Cardiac muscle contraction	3	ko04260	sp|P14927|QCR7_HUMAN;tr|B2RDE1|B2RDE1_HUMAN;tr|D9YZV5|D9YZV5_HUMAN	K00417+K09290+K10373+K10374
beta-Alanine metabolism	3	ko00410	tr|E9KL44|E9KL44_HUMAN;tr|Q53FB6|Q53FB6_HUMAN;tr|Q5T4U5|Q5T4U5_HUMAN	K07515+K00128+K00249
RNA degradation	3	ko03018	sp|P38646|GRP75_HUMAN;sp|Q8TCS8|PNPT1_HUMAN;tr|A0A024R3X4|A0A024R3X4_HUMAN	K04043+K00962+K04077
Purine metabolism	2	ko00230	sp|Q8TCS8|PNPT1_HUMAN;tr|H0Y4R1|H0Y4R1_HUMAN	K00962+K00088
Systemic lupus erythematosus	2	ko05322	sp|Q5SSJ5|HP1B3_HUMAN;sp|Q71DI3|H32_HUMAN	K11252+K11253
Bacterial invasion of epithelial cells	2	ko05100	sp|Q00610|CLH1_HUMAN;tr|A0A024R7S3|A0A024R7S3_HUMAN	K04646+K04645
N-Glycan biosynthesis	2	ko00510	sp|P04843|RPN1_HUMAN;tr|B2RE46|B2RE46_HUMAN	K12666+K12667
Primary bile acid biosynthesis	2	ko00120	sp|P51659|DHB4_HUMAN;tr|B2R761|B2R761_HUMAN	K12405+K08764
Histidine metabolism	2	ko00340	sp|P46087|NOP2_HUMAN;tr|Q53FB6|Q53FB6_HUMAN	K00599+K00128
Caprolactam degradation	2	ko00930	sp|Q16836|HCDH_HUMAN;tr|E9KL44|E9KL44_HUMAN	K00022+K07515
Nitrogen metabolism	2	ko00910	tr|E9KL48|E9KL48_HUMAN;tr|Q5R210|Q5R210_HUMAN	K00261+K01948
Protein digestion and absorption	2	ko04974	tr|J3KPF3|J3KPF3_HUMAN;tr|Q71UA6|Q71UA6_HUMAN	K06519+K05616
Aminobenzoate degradation	2	ko00627	tr|A0A024RAG0|A0A024RAG0_HUMAN;tr|E9KL44|E9KL44_HUMAN	K01077+K07515
Alanine, aspartate and glutamate metabolism	2	ko00250	tr|E9KL48|E9KL48_HUMAN;tr|Q5R210|Q5R210_HUMAN	K00261+K01948
Dilated cardiomyopathy	2	ko05414	tr|B2RDE1|B2RDE1_HUMAN;tr|D9YZV5|D9YZV5_HUMAN	K09290+K10373+K10374
Non-homologous end-joining	2	ko03450	sp|P13010|XRCC5_HUMAN;tr|A0A024R1N4|A0A024R1N4_HUMAN	K10885+K10884
Type I diabetes mellitus	2	ko04940	tr|A0A024R3X4|A0A024R3X4_HUMAN;tr|Q9MYC0|Q9MYC0_HUMAN	K04077+K06751
Apoptosis	2	ko04210	sp|O95831|AIFM1_HUMAN;tr|G4XXL9|G4XXL9_HUMAN	K04727+K08738
Synthesis and degradation of ketone bodies	2	ko00072	sp|P24752|THIL_HUMAN;tr|A0A024R040|A0A024R040_HUMAN	K00626+K01027
Tight junction	2	ko04530	tr|A0A024R1N1|A0A024R1N1_HUMAN;tr|B7Z954|B7Z954_HUMAN	K10352+K06098
Vibrio cholerae infection	2	ko05110	tr|A0A090N8Y2|A0A090N8Y2_HUMAN;tr|B7Z954|B7Z954_HUMAN	K09582+K06098
Reductive carboxylate cycle (CO2 fixation)	2	ko00720	sp|P07954|FUMH_HUMAN;tr|B2RBW5|B2RBW5_HUMAN	K01679+K01681
Lysosome	2	ko04142	sp|Q00610|CLH1_HUMAN;tr|A0A024R7S3|A0A024R7S3_HUMAN	K04646+K04645
Two-component system	2	ko02020	sp|P24752|THIL_HUMAN;tr|A0A024RAG0|A0A024RAG0_HUMAN	K00626+K01077
Hypertrophic cardiomyopathy (HCM)	2	ko05410	tr|B2RDE1|B2RDE1_HUMAN;tr|D9YZV5|D9YZV5_HUMAN	K09290+K10373+K10374
Thyroid cancer	2	ko05216	sp|P12270|TPR_HUMAN;tr|B2RDE1|B2RDE1_HUMAN	K09291+K09290
Adherens junction	2	ko04520	tr|A8K3M3|A8K3M3_HUMAN;tr|E9PMS6|E9PMS6_HUMAN	K05696+K06084
Homologous recombination	1	ko03440	tr|Q567R6|Q567R6_HUMAN	K03111
Renal cell carcinoma	1	ko05211	sp|P07954|FUMH_HUMAN	K01679
mTOR signaling pathway	1	ko04150	tr|E7EX17|E7EX17_HUMAN	K03258
Mismatch repair	1	ko03430	tr|Q567R6|Q567R6_HUMAN	K03111
Glyoxylate and dicarboxylate metabolism	1	ko00630	tr|B2RBW5|B2RBW5_HUMAN	K01681
Insulin signaling pathway	1	ko04910	tr|A8K3M3|A8K3M3_HUMAN	K05696
Polycyclic aromatic hydrocarbon degradation	1	ko00624	sp|P46087|NOP2_HUMAN	K00599
Drug metabolism - other enzymes	1	ko00983	tr|H0Y4R1|H0Y4R1_HUMAN	K00088
Selenoamino acid metabolism	1	ko00450	sp|P46087|NOP2_HUMAN	K00599
Limonene and pinene degradation	1	ko00903	tr|Q53FB6|Q53FB6_HUMAN	K00128
Colorectal cancer	1	ko05210	tr|G4XXL9|G4XXL9_HUMAN	K08738
Inositol phosphate metabolism	1	ko00562	tr|A0A024R6G4|A0A024R6G4_HUMAN	K00140
Chloroalkane and chloroalkene degradation	1	ko00625	tr|Q53FB6|Q53FB6_HUMAN	K00128
Methane metabolism	1	ko00680	sp|Q96HS1|PGAM5_HUMAN	K01834
Terpenoid backbone biosynthesis	1	ko00900	sp|P24752|THIL_HUMAN	K00626
Protein export	1	ko03060	tr|V9HWB4|V9HWB4_HUMAN	K09490
Chagas disease	1	ko05142	tr|V9HW88|V9HW88_HUMAN	K08057
Vascular smooth muscle contraction	1	ko04270	tr|E7EX44|E7EX44_HUMAN	K12327
MAPK signaling pathway - yeast	1	ko04011	sp|P12270|TPR_HUMAN	K09291
Wnt signaling pathway	1	ko04310	tr|A4D0U5|A4D0U5_HUMAN	K04511
Regulation of actin cytoskeleton	1	ko04810	tr|V9HWC0|V9HWC0_HUMAN	K05763
Leukocyte transendothelial migration	1	ko04670	tr|V9HWC0|V9HWC0_HUMAN	K05763
Biosynthesis of unsaturated fatty acids	1	ko01040	tr|E9KL44|E9KL44_HUMAN	K07515
Folate biosynthesis	1	ko00790	tr|A0A024RAG0|A0A024RAG0_HUMAN	K01077
Adipocytokine signaling pathway	1	ko04920	tr|A0A024R5F4|A0A024R5F4_HUMAN	K08765
mRNA surveillance pathway	1	ko03015	sp|Q9H307|PININ_HUMAN	K13114
Ascorbate and aldarate metabolism	1	ko00053	tr|Q53FB6|Q53FB6_HUMAN	K00128
Graft-versus-host disease	1	ko05332	tr|Q9MYC0|Q9MYC0_HUMAN	K06751
Small cell lung cancer	1	ko05222	tr|G4XXL9|G4XXL9_HUMAN	K08738
Metabolism of xenobiotics by cytochrome P450	1	ko00980	sp|Q96SQ9|CP2S1_HUMAN	K07420
Geraniol degradation	1	ko00281	sp|Q16836|HCDH_HUMAN	K00022
Notch signaling pathway	1	ko04330	tr|Q6I9S2|Q6I9S2_HUMAN	K06063
DNA replication	1	ko03030	tr|Q567R6|Q567R6_HUMAN	K03111
Toxoplasmosis	1	ko05145	tr|G4XXL9|G4XXL9_HUMAN	K08738
Prion diseases	1	ko05020	tr|V9HWB4|V9HWB4_HUMAN	K09490
D-Glutamine and D-glutamate metabolism	1	ko00471	tr|E9KL48|E9KL48_HUMAN	K00261
Glycerolipid metabolism	1	ko00561	tr|Q53FB6|Q53FB6_HUMAN	K00128
Pyrimidine metabolism	1	ko00240	sp|Q8TCS8|PNPT1_HUMAN	K00962
Nicotinate and nicotinamide metabolism	1	ko00760	tr|A0A024R0C3|A0A024R0C3_HUMAN	K00323
Proteasome	1	ko03050	tr|Q5U0A0|Q5U0A0_HUMAN	K02729
Cell adhesion molecules (CAMs)	1	ko04514	tr|Q9MYC0|Q9MYC0_HUMAN	K06751
p53 signaling pathway	1	ko04115	tr|G4XXL9|G4XXL9_HUMAN	K08738
Amyotrophic lateral sclerosis (ALS)	1	ko05014	tr|G4XXL9|G4XXL9_HUMAN	K08738
Pathogenic Escherichia coli infection	1	ko05130	tr|A0A024R4A0|A0A024R4A0_HUMAN	K11294
Proximal tubule bicarbonate reclamation	1	ko04964	tr|E9KL48|E9KL48_HUMAN	K00261
Plant-pathogen interaction	1	ko04626	sp|P49411|EFTU_HUMAN	K02358
Valine, leucine and isoleucine biosynthesis	1	ko00290	tr|A0A024RBX9|A0A024RBX9_HUMAN	K00161
Pancreatic secretion	1	ko04972	sp|P16615|AT2A2_HUMAN	K05853
Pentose and glucuronate interconversions	1	ko00040	tr|Q53FB6|Q53FB6_HUMAN	K00128
Autoimmune thyroid disease	1	ko05320	tr|Q9MYC0|Q9MYC0_HUMAN	K06751
Base excision repair	1	ko03410	tr|B4E0E1|B4E0E1_HUMAN	K10798
Allograft rejection	1	ko05330	tr|Q9MYC0|Q9MYC0_HUMAN	K06751
Glycine, serine and threonine metabolism	1	ko00260	tr|A0A024R713|A0A024R713_HUMAN	K00382
Tyrosine metabolism	1	ko00350	sp|P46087|NOP2_HUMAN	K00599
Down-regulated
#Pathway	Count (164)	Pathway ID	Proteins	KOs
Metabolic pathways	29	ko01100	sp|O43175|SERA_HUMAN;sp|P23921|RIR1_HUMAN;sp|P37837|TALDO_HUMAN;sp|P46977|STT3A_HUMAN;sp|P49327|FAS_HUMAN;sp|P60174|TPIS_HUMAN;sp|Q16850|CP51A_HUMAN;sp|Q9BWD1|THIC_HUMAN;tr|A0A024R1T9|A0A024R1T9_HUMAN;tr|A0A0A0MSS8|A0A0A0MSS8_HUMAN;tr|A0A0A0MTS2|A0A0A0MTS2_HUMAN;tr|A8K3A8|A8K3A8_HUMAN;tr|B4DHQ3|B4DHQ3_HUMAN;tr|C9J2Y9|C9J2Y9_HUMAN;tr|E5KRK5|E5KRK5_HUMAN;tr|F8VPD4|F8VPD4_HUMAN;tr|Q06TE6|Q06TE6_HUMA…	K00058+K10807+K00616+K07151+K00665+K01803+K05917+K00626+K01648+K00037+K00100+K01810+K01886+K00831+K03010+K03934+K11540+K02261+K11787+K00016+K01834+K01641+K00274+K11188+K00615+K00025+K00927+K00933+K00213
Ribosome	17	ko03010	sp|P15880|RS2_HUMAN;sp|P25398|RS12_HUMAN;sp|P27635|RL10_HUMAN;sp|P62269|RS18_HUMAN;sp|Q02543|RL18A_HUMAN;sp|Q9BYD1|RM13_HUMAN;tr|A0A024R2Q4|A0A024R2Q4_HUMAN;tr|A0A024R4M0|A0A024R4M0_HUMAN;tr|A0A024R814|A0A024R814_HUMAN;tr|A0A024RD36|A0A024RD36_HUMAN;tr|B2R491|B2R491_HUMAN;tr|B2R4W8|B2R4W8_HUMAN;tr|J3QQ67|J3QQ67_HUMAN;tr|M0R0F0|M0R0F0_HUMAN;tr|Q53G49|Q53G49_HUMAN;tr|Q5QTS3|Q5QTS3_HUMAN;tr|Q9HBB3|Q…	K02981+K02951+K02866+K02964+K02882+K02871+K02877+K02997+K02937+K02987+K02957+K02883+K02989+K02885+K02872+K02934
Biosynthesis of secondary metabolites	17	ko01110	sp|P37837|TALDO_HUMAN;sp|P60174|TPIS_HUMAN;sp|Q16850|CP51A_HUMAN;sp|Q9BWD1|THIC_HUMAN;tr|A0A024R1T9|A0A024R1T9_HUMAN;tr|A0A0A0MTS2|A0A0A0MTS2_HUMAN;tr|Q59HH3|Q59HH3_HUMAN;tr|Q5U077|Q5U077_HUMAN;tr|Q6P6D7|Q6P6D7_HUMAN;tr|Q8N995|Q8N995_HUMAN;tr|Q8TBI1|Q8TBI1_HUMAN;tr|V9HWB9|V9HWB9_HUMAN;tr|V9HWC7|V9HWC7_HUMAN;tr|V9HWD9|V9HWD9_HUMAN;tr|V9HWF2|V9HWF2_HUMAN;tr|V9HWF4|V9HWF4_HUMAN;tr|X5DNI9|X5DNI9_HUMAN	K00616+K01803+K05917+K00626+K01648+K01810+K11787+K00016+K01834+K01641+K00274+K11188+K00615+K00025+K00927+K00213
Microbial metabolism in diverse environments	15	ko01120	sp|O43175|SERA_HUMAN;sp|P37837|TALDO_HUMAN;sp|P60174|TPIS_HUMAN;sp|Q9BWD1|THIC_HUMAN;tr|A0A024R1T9|A0A024R1T9_HUMAN;tr|A0A0A0MSS8|A0A0A0MSS8_HUMAN;tr|A0A0A0MTS2|A0A0A0MTS2_HUMAN;tr|B4DHQ3|B4DHQ3_HUMAN;tr|Q5U077|Q5U077_HUMAN;tr|Q6P6D7|Q6P6D7_HUMAN;tr|V9HWB9|V9HWB9_HUMAN;tr|V9HWC7|V9HWC7_HUMAN;tr|V9HWD9|V9HWD9_HUMAN;tr|V9HWF2|V9HWF2_HUMAN;tr|V9HWF4|V9HWF4_HUMAN	K00058+K00616+K01803+K00626+K01648+K00100+K01810+K00831+K00016+K01834+K11188+K00615+K00025+K00927
RNA transport	14	ko03013	sp|O14980|XPO1_HUMAN;sp|P78344|IF4G2_HUMAN;sp|Q14152|EIF3A_HUMAN;sp|Q15056|IF4H_HUMAN;sp|Q9Y3F4|STRAP_HUMAN;tr|A0A024RAM0|A0A024RAM0_HUMAN;tr|A0A024RBY4|A0A024RBY4_HUMAN;tr|A0A024RDY0|A0A024RDY0_HUMAN;tr|B2R6E2|B2R6E2_HUMAN;tr|B2RBR9|B2RBR9_HUMAN;tr|B5MDF5|B5MDF5_HUMAN;tr|E7EX73|E7EX73_HUMAN;tr|E9PF10|E9PF10_HUMAN;tr|Q8N5A0|Q8N5A0_HUMAN	K14290+K03260+K03254+K03258+K13137+K14293+K03242+K07936+K14312+K03243
Endocytosis	7	ko04144	sp|P50570|DYN2_HUMAN;sp|P51149|RAB7A_HUMAN;tr|A0A024R5H1|A0A024R5H1_HUMAN;tr|A0A024RB85|A0A024RB85_HUMAN;tr|D3DUW6|D3DUW6_HUMAN;tr|E9PFW3|E9PFW3_HUMAN;tr|H0UID4|H0UID4_HUMAN	K01528+K07897+K13649+K05084+K11826+K11825
Bacterial invasion of epithelial cells	7	ko05100	sp|P35221|CTNA1_HUMAN;sp|P46109|CRKL_HUMAN;sp|P50570|DYN2_HUMAN;tr|A0A024QZN4|A0A024QZN4_HUMAN;tr|A4D2P0|A4D2P0_HUMAN;tr|D3DUW6|D3DUW6_HUMAN;tr|V9HWF0|V9HWF0_HUMAN	K05691+K04438+K01528+K05700+K04392+K06272
Spliceosome	7	ko03040	sp|Q13435|SF3B2_HUMAN;sp|Q14690|RRP5_HUMAN;sp|Q6P2Q9|PRP8_HUMAN;tr|A0A024R1K8|A0A024R1K8_HUMAN;tr|A8MT02|A8MT02_HUMAN;tr|B2R802|B2R802_HUMAN;tr|Q53G61|Q53G61_HUMAN	K12829+K12869+K12867+K12856+K12825+K11086+K11091+K11092
Pathways in cancer	7	ko05200	sp|P35221|CTNA1_HUMAN;sp|P46109|CRKL_HUMAN;tr|A0A024R1X8|A0A024R1X8_HUMAN;tr|A0A024RD80|A0A024RD80_HUMAN;tr|A4D2P0|A4D2P0_HUMAN;tr|G3V5T9|G3V5T9_HUMAN;tr|K9JA46|K9JA46_HUMAN	K05691+K04438+K10056+K04079+K04392+K02206
Progesterone-mediated oocyte maturation	7	ko04914	sp|Q9H9B4|SFXN1_HUMAN;tr|A0A024R7J0|A0A024R7J0_HUMAN;tr|A0A024RD15|A0A024RD15_HUMAN;tr|A0A024RD80|A0A024RD80_HUMAN;tr|A0A0A0MS41|A0A0A0MS41_HUMAN;tr|G3V5T9|G3V5T9_HUMAN;tr|K9JA46|K9JA46_HUMAN	K03351+K04345+K04441+K04079+K02206
Protein processing in endoplasmic reticulum	6	ko04141	sp|P46977|STT3A_HUMAN;tr|A0A024R6S1|A0A024R6S1_HUMAN;tr|A0A024RD80|A0A024RD80_HUMAN;tr|B2R6U8|B2R6U8_HUMAN;tr|K9JA46|K9JA46_HUMAN;tr|Q6FI51|Q6FI51_HUMAN	K07151+K09503+K04079+K10636+K09507
Focal adhesion	6	ko04510	sp|P46109|CRKL_HUMAN;tr|A0A024QZN4|A0A024QZN4_HUMAN;tr|A0A024R0V4|A0A024R0V4_HUMAN;tr|A4D2P0|A4D2P0_HUMAN;tr|E9PEZ3|E9PEZ3_HUMAN;tr|V9HWF0|V9HWF0_HUMAN	K04438+K05700+K06274+K04392+K05740+K06272
MAPK signaling pathway	6	ko04010	sp|P46109|CRKL_HUMAN;sp|Q9H3U1|UN45A_HUMAN;tr|A0A024R7J0|A0A024R7J0_HUMAN;tr|A0A024RD15|A0A024RD15_HUMAN;tr|A4D2P0|A4D2P0_HUMAN;tr|V9HW43|V9HW43_HUMAN	K04438+K04460+K04345+K04441+K04392+K04455
Huntington's disease	6	ko05016	sp|Q9H936|GHC1_HUMAN;tr|C9J2Y9|C9J2Y9_HUMAN;tr|E5KRK5|E5KRK5_HUMAN;tr|E9PFW3|E9PFW3_HUMAN;tr|H0UID4|H0UID4_HUMAN;tr|Q06TE6|Q06TE6_HUMAN	K05863+K03010+K03934+K11826+K11825+K02261
Glycolysis / Gluconeogenesis	6	ko00010	sp|P60174|TPIS_HUMAN;tr|A0A0A0MTS2|A0A0A0MTS2_HUMAN;tr|Q5U077|Q5U077_HUMAN;tr|Q6P6D7|Q6P6D7_HUMAN;tr|V9HWB9|V9HWB9_HUMAN;tr|V9HWF4|V9HWF4_HUMAN	K01803+K01810+K00016+K01834+K00927
Aminoacyl-tRNA biosynthesis	6	ko00970	sp|P26639|SYTC_HUMAN;sp|P41252|SYIC_HUMAN;tr|A0A024R4G1|A0A024R4G1_HUMAN;tr|A0A024RCN6|A0A024RCN6_HUMAN;tr|A8K3A8|A8K3A8_HUMAN;tr|B2RBS8|B2RBS8_HUMAN	K01868+K01870+K01890+K01873+K01886+K01883
Regulation of actin cytoskeleton	5	ko04810	sp|P46109|CRKL_HUMAN;tr|A0A024QZN4|A0A024QZN4_HUMAN;tr|A0A024RC65|A0A024RC65_HUMAN;tr|A4D2P0|A4D2P0_HUMAN;tr|E9PEZ3|E9PEZ3_HUMAN	K04438+K05700+K05767+K04392+K05740
Leukocyte transendothelial migration	5	ko04670	sp|P35221|CTNA1_HUMAN;tr|A0A024QZN4|A0A024QZN4_HUMAN;tr|A0A024R0V4|A0A024R0V4_HUMAN;tr|A0A024RD15|A0A024RD15_HUMAN;tr|A4D2P0|A4D2P0_HUMAN	K05691+K05700+K06274+K04441+K04392
NOD-like receptor signaling pathway	5	ko04621	tr|A0A024RC87|A0A024RC87_HUMAN;tr|A0A024RD15|A0A024RD15_HUMAN;tr|A0A024RD80|A0A024RD80_HUMAN;tr|K9JA46|K9JA46_HUMAN;tr|Q32Q10|Q32Q10_HUMAN	K12800+K04441+K04079+K12796
Fc gamma R-mediated phagocytosis	5	ko04666	sp|P46109|CRKL_HUMAN;sp|P50570|DYN2_HUMAN;tr|A0A024R0V4|A0A024R0V4_HUMAN;tr|A4D2P0|A4D2P0_HUMAN;tr|D3DUW6|D3DUW6_HUMAN	K04438+K01528+K06274+K04392
Shigellosis	5	ko05131	sp|P46109|CRKL_HUMAN;tr|A0A024QZN4|A0A024QZN4_HUMAN;tr|A0A024RD15|A0A024RD15_HUMAN;tr|A4D2P0|A4D2P0_HUMAN;tr|E9PEZ3|E9PEZ3_HUMAN	K04438+K05700+K04441+K04392+K05740
Oocyte meiosis	5	ko04114	sp|P27348|1433T_HUMAN;sp|Q9H9B4|SFXN1_HUMAN;tr|A0A024R7J0|A0A024R7J0_HUMAN;tr|A0A0A0MS41|A0A0A0MS41_HUMAN;tr|G3V5T9|G3V5T9_HUMAN	K06630+K03351+K04345+K02206
Ubiquitin mediated proteolysis	5	ko04120	sp|O95071|UBR5_HUMAN;sp|Q9H9B4|SFXN1_HUMAN;tr|A0A024R9U8|A0A024R9U8_HUMAN;tr|A0A0A0MS41|A0A0A0MS41_HUMAN;tr|B2RBP3|B2RBP3_HUMAN	K10593+K03351+K10592+K10686
Purine metabolism	4	ko00230	sp|P23921|RIR1_HUMAN;sp|Q96AG4|LRC59_HUMAN;tr|C9J2Y9|C9J2Y9_HUMAN;tr|Q59HH3|Q59HH3_HUMAN	K10807+K01768+K03010+K11787
Methane metabolism	4	ko00680	sp|O43175|SERA_HUMAN;tr|B4DHQ3|B4DHQ3_HUMAN;tr|Q6P6D7|Q6P6D7_HUMAN;tr|V9HWC7|V9HWC7_HUMAN	K00058+K00831+K01834+K11188
Amoebiasis	4	ko05146	sp|P51149|RAB7A_HUMAN;tr|A0A024QZN4|A0A024QZN4_HUMAN;tr|A0A024R7J0|A0A024R7J0_HUMAN;tr|V9HW43|V9HW43_HUMAN	K07897+K05700+K04345+K04455
Pyruvate metabolism	4	ko00620	sp|Q9BWD1|THIC_HUMAN;tr|Q5U077|Q5U077_HUMAN;tr|V9HWB9|V9HWB9_HUMAN;tr|V9HWF2|V9HWF2_HUMAN	K00626+K00016+K00025
Insulin signaling pathway	4	ko04910	sp|P06737|PYGL_HUMAN;sp|P46109|CRKL_HUMAN;sp|P49327|FAS_HUMAN;tr|A0A024R7J0|A0A024R7J0_HUMAN	K00688+K04438+K00665+K04345
Viral myocarditis	4	ko05416	sp|P78344|IF4G2_HUMAN;tr|A4D2P0|A4D2P0_HUMAN;tr|B2R6E2|B2R6E2_HUMAN;tr|E7EX73|E7EX73_HUMAN	K03260+K04392
Neurotrophin signaling pathway	4	ko04722	sp|P27348|1433T_HUMAN;sp|P46109|CRKL_HUMAN;tr|A0A024RD15|A0A024RD15_HUMAN;tr|A4D2P0|A4D2P0_HUMAN	K06630+K04438+K04441+K04392
Meiosis - yeast	4	ko04113	sp|Q96AG4|LRC59_HUMAN;sp|Q9H9B4|SFXN1_HUMAN;tr|A0A024R7J0|A0A024R7J0_HUMAN;tr|A0A0A0MS41|A0A0A0MS41_HUMAN	K01768+K03351+K04345
Cell cycle	4	ko04110	sp|P27348|1433T_HUMAN;sp|Q9H9B4|SFXN1_HUMAN;tr|A0A0A0MS41|A0A0A0MS41_HUMAN;tr|G3V5T9|G3V5T9_HUMAN	K06630+K03351+K02206
Carbon fixation in photosynthetic organisms	4	ko00710	sp|P60174|TPIS_HUMAN;tr|V9HWD9|V9HWD9_HUMAN;tr|V9HWF2|V9HWF2_HUMAN;tr|V9HWF4|V9HWF4_HUMAN	K01803+K00615+K00025+K00927
Systemic lupus erythematosus	3	ko05322	sp|Q6PKG0|LARP1_HUMAN;tr|A8MT02|A8MT02_HUMAN;tr|B2R4R0|B2R4R0_HUMAN	K11090+K11086+K11254
Cell cycle - yeast	3	ko04111	sp|Q9H9B4|SFXN1_HUMAN;tr|A0A0A0MS41|A0A0A0MS41_HUMAN;tr|B3KMS0|B3KMS0_HUMAN	K03351+K06677
Calcium signaling pathway	3	ko04020	sp|Q9H936|GHC1_HUMAN;tr|A0A024R7J0|A0A024R7J0_HUMAN;tr|A0A024RB85|A0A024RB85_HUMAN	K05863+K04345+K05084
Chemokine signaling pathway	3	ko04062	sp|P46109|CRKL_HUMAN;tr|A0A024R7J0|A0A024R7J0_HUMAN;tr|A4D2P0|A4D2P0_HUMAN	K04438+K04345+K04392
Propanoate metabolism	3	ko00640	sp|Q9BWD1|THIC_HUMAN;tr|Q5U077|Q5U077_HUMAN;tr|V9HWB9|V9HWB9_HUMAN	K00626+K00016
Phagosome	3	ko04145	sp|P51149|RAB7A_HUMAN;sp|Q14204|DYHC1_HUMAN;tr|A4D2P0|A4D2P0_HUMAN	K07897+K10413+K04392
Glycine, serine and threonine metabolism	3	ko00260	sp|O43175|SERA_HUMAN;tr|B4DHQ3|B4DHQ3_HUMAN;tr|Q8TBI1|Q8TBI1_HUMAN	K00058+K00831+K00274
Pentose phosphate pathway	3	ko00030	sp|P37837|TALDO_HUMAN;tr|A0A0A0MTS2|A0A0A0MTS2_HUMAN;tr|V9HWD9|V9HWD9_HUMAN	K00616+K01810+K00615
Parkinson's disease	3	ko05012	sp|Q9H936|GHC1_HUMAN;tr|E5KRK5|E5KRK5_HUMAN;tr|Q06TE6|Q06TE6_HUMAN	K05863+K03934+K02261
Prostate cancer	3	ko05215	tr|A0A024RD80|A0A024RD80_HUMAN;tr|G3V5T9|G3V5T9_HUMAN;tr|K9JA46|K9JA46_HUMAN	K04079+K02206
Lysine degradation	3	ko00310	sp|O60568|PLOD3_HUMAN;sp|Q9BWD1|THIC_HUMAN;tr|B2R5M9|B2R5M9_HUMAN	K13646+K00626+K00473
Wnt signaling pathway	3	ko04310	tr|A0A024R7J0|A0A024R7J0_HUMAN;tr|A0A024R904|A0A024R904_HUMAN;tr|A4D2P0|A4D2P0_HUMAN	K04345+K04507+K04392
Butanoate metabolism	3	ko00650	sp|Q9BWD1|THIC_HUMAN;tr|A0A0A0MSS8|A0A0A0MSS8_HUMAN;tr|Q8N995|Q8N995_HUMAN	K00626+K00100+K01641
VEGF signaling pathway	3	ko04370	tr|A0A024RD15|A0A024RD15_HUMAN;tr|A4D2P0|A4D2P0_HUMAN;tr|V9HW43|V9HW43_HUMAN	K04441+K04392+K04455
Pyrimidine metabolism	3	ko00240	sp|P23921|RIR1_HUMAN;tr|C9J2Y9|C9J2Y9_HUMAN;tr|F8VPD4|F8VPD4_HUMAN	K10807+K03010+K11540
Fructose and mannose metabolism	3	ko00051	sp|O60825|F262_HUMAN;sp|P60174|TPIS_HUMAN;tr|A0A0A0MSS8|A0A0A0MSS8_HUMAN	K00900+K01103+K01803+K00100
Amyotrophic lateral sclerosis (ALS)	3	ko05014	tr|A0A024R0P9|A0A024R0P9_HUMAN;tr|A0A024RD15|A0A024RD15_HUMAN;tr|A4D2P0|A4D2P0_HUMAN	K11518+K04441+K04392
Antigen processing and presentation	3	ko04612	sp|P34932|HSP74_HUMAN;tr|A0A024RD80|A0A024RD80_HUMAN;tr|K9JA46|K9JA46_HUMAN	K09489+K04079
Adherens junction	3	ko04520	sp|P35221|CTNA1_HUMAN;tr|A0A024QZN4|A0A024QZN4_HUMAN;tr|A4D2P0|A4D2P0_HUMAN	K05691+K05700+K04392
Renal cell carcinoma	2	ko05211	sp|P46109|CRKL_HUMAN;tr|A4D2P0|A4D2P0_HUMAN	K04438+K04392
Amino sugar and nucleotide sugar metabolism	2	ko00520	sp|P51610|HCFC1_HUMAN;tr|A0A0A0MTS2|A0A0A0MTS2_HUMAN	K01787+K01810
ErbB signaling pathway	2	ko04012	sp|P46109|CRKL_HUMAN;tr|A0A024RB85|A0A024RB85_HUMAN	K04438+K05084
Toll-like receptor signaling pathway	2	ko04620	tr|A0A024RD15|A0A024RD15_HUMAN;tr|A4D2P0|A4D2P0_HUMAN	K04441+K04392
Osteoclast differentiation	2	ko04380	tr|A0A024RD15|A0A024RD15_HUMAN;tr|A4D2P0|A4D2P0_HUMAN	K04441+K04392
Bile secretion	2	ko04976	sp|P54709|AT1B3_HUMAN;tr|A0A024R7J0|A0A024R7J0_HUMAN	K01540+K04345
Cysteine and methionine metabolism	2	ko00270	tr|Q5U077|Q5U077_HUMAN;tr|V9HWB9|V9HWB9_HUMAN	K00016
Metabolism of xenobiotics by cytochrome P450	2	ko00980	tr|A0A0A0MSS8|A0A0A0MSS8_HUMAN;tr|Q6FGJ9|Q6FGJ9_HUMAN	K00212+K00799
Glutathione metabolism	2	ko00480	sp|P23921|RIR1_HUMAN;tr|Q6FGJ9|Q6FGJ9_HUMAN	K10807+K00799
Tryptophan metabolism	2	ko00380	sp|Q9BWD1|THIC_HUMAN;tr|Q8TBI1|Q8TBI1_HUMAN	K00626+K00274
Steroid biosynthesis	2	ko00100	sp|Q16850|CP51A_HUMAN;tr|X5DNI9|X5DNI9_HUMAN	K05917+K00213
Fc epsilon RI signaling pathway	2	ko04664	tr|A0A024RD15|A0A024RD15_HUMAN;tr|A4D2P0|A4D2P0_HUMAN	K04441+K04392
Valine, leucine and isoleucine degradation	2	ko00280	sp|Q9BWD1|THIC_HUMAN;tr|Q8N995|Q8N995_HUMAN	K00626+K01641
Cardiac muscle contraction	2	ko04260	sp|P54709|AT1B3_HUMAN;tr|Q06TE6|Q06TE6_HUMAN	K01540+K02261
p53 signaling pathway	2	ko04115	sp|Q96AG4|LRC59_HUMAN;tr|G3V5T9|G3V5T9_HUMAN	K10130+K02206
Plant-pathogen interaction	2	ko04626	tr|A0A024RD80|A0A024RD80_HUMAN;tr|K9JA46|K9JA46_HUMAN	K04079
Gastric acid secretion	2	ko04971	sp|P54709|AT1B3_HUMAN;tr|A0A024R7J0|A0A024R7J0_HUMAN	K01540+K04345
Endometrial cancer	2	ko05213	sp|P35221|CTNA1_HUMAN;tr|V9HWF0|V9HWF0_HUMAN	K05691+K06272
Base excision repair	2	ko03410	tr|A8K6N3|A8K6N3_HUMAN;tr|Q5TZP7|Q5TZP7_HUMAN	K10798+K10771
Drug metabolism - cytochrome P450	2	ko00982	tr|Q6FGJ9|Q6FGJ9_HUMAN;tr|Q8TBI1|Q8TBI1_HUMAN	K00799+K00274
Starch and sucrose metabolism	2	ko00500	sp|P06737|PYGL_HUMAN;tr|A0A0A0MTS2|A0A0A0MTS2_HUMAN	K00688+K01810
Salivary secretion	2	ko04970	sp|P54709|AT1B3_HUMAN;tr|A0A024R7J0|A0A024R7J0_HUMAN	K01540+K04345
GnRH signaling pathway	2	ko04912	tr|A0A024R7J0|A0A024R7J0_HUMAN;tr|A0A024RD15|A0A024RD15_HUMAN	K04345+K04441
Oxidative phosphorylation	2	ko00190	tr|E5KRK5|E5KRK5_HUMAN;tr|Q06TE6|Q06TE6_HUMAN	K03934+K02261
Terpenoid backbone biosynthesis	2	ko00900	sp|Q9BWD1|THIC_HUMAN;tr|Q8N995|Q8N995_HUMAN	K00626+K01641
Alzheimer's disease	2	ko05010	tr|E5KRK5|E5KRK5_HUMAN;tr|Q06TE6|Q06TE6_HUMAN	K03934+K02261
Epithelial cell signaling in Helicobacter pylori infection	2	ko05120	tr|A0A024RD15|A0A024RD15_HUMAN;tr|A4D2P0|A4D2P0_HUMAN	K04441+K04392
Vasopressin-regulated water reabsorption	2	ko04962	sp|Q14204|DYHC1_HUMAN;tr|A0A024R7J0|A0A024R7J0_HUMAN	K10413+K04345
Arrhythmogenic right ventricular cardiomyopathy (ARVC)	2	ko05412	sp|P35221|CTNA1_HUMAN;tr|A0A024R1X8|A0A024R1X8_HUMAN	K05691+K10056
Arginine and proline metabolism	2	ko00330	tr|Q8TBI1|Q8TBI1_HUMAN;tr|V9HWH2|V9HWH2_HUMAN	K00274+K00933
Citrate cycle (TCA cycle)	2	ko00020	tr|A0A024R1T9|A0A024R1T9_HUMAN;tr|V9HWF2|V9HWF2_HUMAN	K01648+K00025
Phenylalanine metabolism	2	ko00360	tr|Q8TBI1|Q8TBI1_HUMAN;tr|V9HWC7|V9HWC7_HUMAN	K00274+K11188
Synthesis and degradation of ketone bodies	2	ko00072	sp|Q9BWD1|THIC_HUMAN;tr|Q8N995|Q8N995_HUMAN	K00626+K01641
Proteasome	2	ko03050	sp|Q13200|PSMD2_HUMAN;tr|B2RD27|B2RD27_HUMAN	K03028+K03038
Proximal tubule bicarbonate reclamation	2	ko04964	sp|P54709|AT1B3_HUMAN;tr|V9HWF2|V9HWF2_HUMAN	K01540+K00025
Valine, leucine and isoleucine biosynthesis	2	ko00290	sp|P41252|SYIC_HUMAN;tr|A0A024RCN6|A0A024RCN6_HUMAN	K01870+K01873
Olfactory transduction	2	ko04740	tr|A0A024R7J0|A0A024R7J0_HUMAN;tr|Q53GR7|Q53GR7_HUMAN	K04345+K04257
Pancreatic secretion	2	ko04972	sp|P54709|AT1B3_HUMAN;tr|A4D2P0|A4D2P0_HUMAN	K01540+K04392
RNA degradation	2	ko03018	sp|P26196|DDX6_HUMAN;sp|Q96AG4|LRC59_HUMAN	K12614+K12603
Natural killer cell mediated cytotoxicity	1	ko04650	tr|A4D2P0|A4D2P0_HUMAN	K04392
Hepatitis C	1	ko05160	tr|A0A024RD15|A0A024RD15_HUMAN	K04441
Fatty acid biosynthesis	1	ko00061	sp|P49327|FAS_HUMAN	K00665
Gap junction	1	ko04540	tr|A0A024R7J0|A0A024R7J0_HUMAN	K04345
Linoleic acid metabolism	1	ko00591	tr|A0A0A0MSS8|A0A0A0MSS8_HUMAN	K00100
PPAR signaling pathway	1	ko03320	tr|V9HWF0|V9HWF0_HUMAN	K06272
Axon guidance	1	ko04360	tr|A4D2P0|A4D2P0_HUMAN	K04392
N-Glycan biosynthesis	1	ko00510	sp|P46977|STT3A_HUMAN	K07151
Chagas disease	1	ko05142	tr|A0A024RD15|A0A024RD15_HUMAN	K04441
Melanogenesis	1	ko04916	tr|A0A024R7J0|A0A024R7J0_HUMAN	K04345
Vascular smooth muscle contraction	1	ko04270	tr|A0A024R7J0|A0A024R7J0_HUMAN	K04345
Primary bile acid biosynthesis	1	ko00120	tr|A0A0A0MSS8|A0A0A0MSS8_HUMAN	K00037
Histidine metabolism	1	ko00340	tr|Q8TBI1|Q8TBI1_HUMAN	K00274
Basal transcription factors	1	ko03022	tr|X5D2J9|X5D2J9_HUMAN	K03121
mRNA surveillance pathway	1	ko03015	tr|Q7KZX8|Q7KZX8_HUMAN	K03267
Leishmaniasis	1	ko05140	tr|A0A024RD15|A0A024RD15_HUMAN	K04441
Hedgehog signaling pathway	1	ko04340	tr|A0A024R7J0|A0A024R7J0_HUMAN	K04345
Protein digestion and absorption	1	ko04974	sp|P54709|AT1B3_HUMAN	K01540
Toxoplasmosis	1	ko05145	tr|A0A024RD15|A0A024RD15_HUMAN	K04441
Isoquinoline alkaloid biosynthesis	1	ko00950	tr|Q8TBI1|Q8TBI1_HUMAN	K00274
Acute myeloid leukemia	1	ko05221	tr|A0A024R1X8|A0A024R1X8_HUMAN	K10056
Nucleotide excision repair	1	ko03420	tr|A0A024RDQ8|A0A024RDQ8_HUMAN	K10756
Vibrio cholerae infection	1	ko05110	tr|A0A024R7J0|A0A024R7J0_HUMAN	K04345
RIG-I-like receptor signaling pathway	1	ko04622	tr|A0A024RD15|A0A024RD15_HUMAN	K04441
Two-component system	1	ko02020	sp|Q9BWD1|THIC_HUMAN	K00626
B cell receptor signaling pathway	1	ko04662	tr|A4D2P0|A4D2P0_HUMAN	K04392
Tyrosine metabolism	1	ko00350	tr|Q8TBI1|Q8TBI1_HUMAN	K00274
Aldosterone-regulated sodium reabsorption	1	ko04960	sp|P54709|AT1B3_HUMAN	K01540
Benzoate degradation	1	ko00362	sp|Q9BWD1|THIC_HUMAN	K00626
mTOR signaling pathway	1	ko04150	sp|Q15056|IF4H_HUMAN	K03258
Glyoxylate and dicarboxylate metabolism	1	ko00630	tr|V9HWF2|V9HWF2_HUMAN	K00025
Mismatch repair	1	ko03430	tr|A0A024RDQ8|A0A024RDQ8_HUMAN	K10756
Colorectal cancer	1	ko05210	tr|A4D2P0|A4D2P0_HUMAN	K04392
Inositol phosphate metabolism	1	ko00562	sp|P60174|TPIS_HUMAN	K01803
Chloroalkane and chloroalkene degradation	1	ko00625	tr|A0A0A0MSS8|A0A0A0MSS8_HUMAN	K00100
Hematopoietic cell lineage	1	ko04640	tr|E9PR17|E9PR17_HUMAN	K04008
Carbohydrate digestion and absorption	1	ko04973	sp|P54709|AT1B3_HUMAN	K01540
Bisphenol degradation	1	ko00363	tr|A0A0A0MSS8|A0A0A0MSS8_HUMAN	K00100
Steroid hormone biosynthesis	1	ko00140	tr|A0A0A0MSS8|A0A0A0MSS8_HUMAN	K00089+K00037+K05295
MAPK signaling pathway - yeast	1	ko04011	tr|A0A024RD15|A0A024RD15_HUMAN	K04441
Arachidonic acid metabolism	1	ko00590	tr|A0A0A0MSS8|A0A0A0MSS8_HUMAN	K04119
Fatty acid metabolism	1	ko00071	sp|Q9BWD1|THIC_HUMAN	K00626
Phenylpropanoid biosynthesis	1	ko00940	tr|V9HWC7|V9HWC7_HUMAN	K11188
Small cell lung cancer	1	ko05222	tr|G3V5T9|G3V5T9_HUMAN	K02206
Other types of O-glycan biosynthesis	1	ko00514	sp|O60568|PLOD3_HUMAN	K13646
DNA replication	1	ko03030	tr|A0A024RDQ8|A0A024RDQ8_HUMAN	K10756
Alanine, aspartate and glutamate metabolism	1	ko00250	tr|F8VPD4|F8VPD4_HUMAN	K11540
Prion diseases	1	ko05020	tr|A0A024R7J0|A0A024R7J0_HUMAN	K04345
T cell receptor signaling pathway	1	ko04660	tr|A0A024RD15|A0A024RD15_HUMAN	K04441
Dilated cardiomyopathy	1	ko05414	tr|A0A024R7J0|A0A024R7J0_HUMAN	K04345
Biosynthesis of ansamycins	1	ko01051	tr|V9HWD9|V9HWD9_HUMAN	K00615
Apoptosis	1	ko04210	tr|A0A024R7J0|A0A024R7J0_HUMAN	K04345
Tight junction	1	ko04530	sp|P35221|CTNA1_HUMAN	K05691
Complement and coagulation cascades	1	ko04610	tr|E9PR17|E9PR17_HUMAN	K04008
RNA polymerase	1	ko03020	tr|C9J2Y9|C9J2Y9_HUMAN	K03010
Cell adhesion molecules (CAMs)	1	ko04514	sp|Q92896|GSLG1_HUMAN	K06816
Reductive carboxylate cycle (CO2 fixation)	1	ko00720	tr|A0A024R1T9|A0A024R1T9_HUMAN	K01648
Long-term potentiation	1	ko04720	tr|A0A024R7J0|A0A024R7J0_HUMAN	K04345
One carbon pool by folate	1	ko00670	tr|Q59HH3|Q59HH3_HUMAN	K11787
Taste transduction	1	ko04742	tr|A0A024R7J0|A0A024R7J0_HUMAN	K04345
Vitamin B6 metabolism	1	ko00750	tr|B4DHQ3|B4DHQ3_HUMAN	K00831
Chronic myeloid leukemia	1	ko05220	sp|P46109|CRKL_HUMAN	K04438
Pancreatic cancer	1	ko05212	tr|A4D2P0|A4D2P0_HUMAN	K04392

## Sheet: HHvsFFA
Up-regulated
#Pathway	Count(197)	Pathway ID	Proteins	KOs
Metabolic pathways	33	ko01100	sp|O15357|SHIP2_HUMAN;sp|O15460|P4HA2_HUMAN;sp|P04843|RPN1_HUMAN;sp|P17812|PYRG1_HUMAN;sp|P33316|DUT_HUMAN;sp|P46977|STT3A_HUMAN;sp|P49748|ACADV_HUMAN;sp|P54886|P5CS_HUMAN;sp|Q01813|PFKAP_HUMAN;sp|Q96IR7|HPDL_HUMAN;sp|Q9Y2B0|CNPY2_HUMAN;tr|A0A024R6W0|A0A024R6W0_HUMAN;tr|A0A024R8N6|A0A024R8N6_HUMAN;tr|A0A087WVM4|A0A087WVM4_HUMAN;tr|A0A087WWF6|A0A087WWF6_HUMAN;tr|A0A0A0MSS8|A0A0A0MSS8_HUMAN;tr|A8K3…	K01106+K00472+K12666+K01937+K01520+K07151+K09479+K12657+K00850+K00457+K01647+K00813+K00857+K13402+K02328+K00037+K00100+K01886+K01077+K00923+K03008+K00548+K00758+K03934+K11540+K00026+K00274+K00600+K02133+K00016+K00868+K03783+K05546
Protein processing in endoplasmic reticulum	19	ko04141	sp|P04843|RPN1_HUMAN;sp|P46977|STT3A_HUMAN;sp|Q15084|PDIA6_HUMAN;sp|Q8NBS9|TXND5_HUMAN;tr|A0A024R9G7|A0A024R9G7_HUMAN;tr|A0A024RBH2|A0A024RBH2_HUMAN;tr|A0A087X054|A0A087X054_HUMAN;tr|A0A090N8Y2|A0A090N8Y2_HUMAN;tr|A0A0A0MRV0|A0A0A0MRV0_HUMAN;tr|A8KAK1|A8KAK1_HUMAN;tr|B2R6U8|B2R6U8_HUMAN;tr|K7ELL7|K7ELL7_HUMAN;tr|Q53FF5|Q53FF5_HUMAN;tr|Q53ZP9|Q53ZP9_HUMAN;tr|V9HVY3|V9HVY3_HUMAN;tr|V9HW71|V9HW71_HU…	K12666+K07151+K09584+K13984+K13525+K13999+K09486+K09582+K14000+K11718+K10636+K08288+K14012+K09485+K08056+K09586+K09490+K05546+K09487
Focal adhesion	14	ko04510	sp|O15230|LAMA5_HUMAN;sp|O43707|ACTN4_HUMAN;sp|P05556|ITB1_HUMAN;sp|P21333|FLNA_HUMAN;sp|P46109|CRKL_HUMAN;sp|Q86VS8|HOOK3_HUMAN;tr|A0A024R0Q5|A0A024R0Q5_HUMAN;tr|A0A024R0V4|A0A024R0V4_HUMAN;tr|A0A024R972|A0A024R972_HUMAN;tr|A0A024RB87|A0A024RB87_HUMAN;tr|A4D2P0|A4D2P0_HUMAN;tr|A5YM53|A5YM53_HUMAN;tr|B2R627|B2R627_HUMAN;tr|V9HWF0|V9HWF0_HUMAN	K06240+K05699+K05719+K04437+K04438+K05637+K06270+K06274+K05635+K07836+K04392+K06487+K06484+K06272
Pathways in cancer	12	ko05200	sp|O15230|LAMA5_HUMAN;sp|P05556|ITB1_HUMAN;sp|P35221|CTNA1_HUMAN;sp|P46109|CRKL_HUMAN;sp|Q86VS8|HOOK3_HUMAN;tr|A0A024R1X8|A0A024R1X8_HUMAN;tr|A0A024R972|A0A024R972_HUMAN;tr|A4D2P0|A4D2P0_HUMAN;tr|A5YM53|A5YM53_HUMAN;tr|B2RDE1|B2RDE1_HUMAN;tr|G3V5T9|G3V5T9_HUMAN;tr|V9HWP2|V9HWP2_HUMAN	K06240+K05719+K05691+K04438+K05637+K10056+K05635+K04392+K06487+K09290+K02206+K09487
RNA transport	12	ko03013	sp|P78344|IF4G2_HUMAN;sp|Q14152|EIF3A_HUMAN;sp|Q8TEM1|PO210_HUMAN;tr|A0A024RAM0|A0A024RAM0_HUMAN;tr|A0A024RBY4|A0A024RBY4_HUMAN;tr|A0A024RDY0|A0A024RDY0_HUMAN;tr|B2R6E2|B2R6E2_HUMAN;tr|B2RBR9|B2RBR9_HUMAN;tr|E7EX73|E7EX73_HUMAN;tr|E9PF10|E9PF10_HUMAN;tr|G5E9D5|G5E9D5_HUMAN;tr|Q8N5A0|Q8N5A0_HUMAN	K03260+K03254+K14314+K14293+K03242+K14312+K00784+K03243
Ribosome	11	ko03010	sp|P62906|RL10A_HUMAN;sp|Q02543|RL18A_HUMAN;sp|Q9BYD1|RM13_HUMAN;tr|B2R491|B2R491_HUMAN;tr|B2R4W8|B2R4W8_HUMAN;tr|C9J9K3|C9J9K3_HUMAN;tr|J3QQ67|J3QQ67_HUMAN;tr|M0R0F0|M0R0F0_HUMAN;tr|Q53G49|Q53G49_HUMAN;tr|Q5QTS3|Q5QTS3_HUMAN;tr|Q9HBB3|Q9HBB3_HUMAN	K02865+K02882+K02871+K02987+K02957+K02998+K02883+K02989+K02885+K02872+K02934
Regulation of actin cytoskeleton	10	ko04810	sp|O43707|ACTN4_HUMAN;sp|P05556|ITB1_HUMAN;sp|P46109|CRKL_HUMAN;sp|Q15417|CNN3_HUMAN;sp|Q27J81|INF2_HUMAN;tr|A0A024R0Q5|A0A024R0Q5_HUMAN;tr|A4D2P0|A4D2P0_HUMAN;tr|A5YM53|A5YM53_HUMAN;tr|B2R627|B2R627_HUMAN;tr|E7EQR4|E7EQR4_HUMAN	K05699+K05719+K04438+K13710+K05741+K05745+K06270+K04392+K06487+K06484+K08007
Biosynthesis of secondary metabolites	10	ko01110	sp|Q01813|PFKAP_HUMAN;sp|Q9Y2B0|CNPY2_HUMAN;tr|A0A024R6W0|A0A024R6W0_HUMAN;tr|B4DJV2|B4DJV2_HUMAN;tr|B4DST3|B4DST3_HUMAN;tr|Q6FHZ0|Q6FHZ0_HUMAN;tr|Q8TBI1|Q8TBI1_HUMAN;tr|V9HW06|V9HW06_HUMAN;tr|V9HWB9|V9HWB9_HUMAN;tr|V9HWH6|V9HWH6_HUMAN	K00850+K01647+K00813+K00548+K00026+K00274+K00600+K00016+K03783
Microbial metabolism in diverse environments	9	ko01120	sp|Q01813|PFKAP_HUMAN;sp|Q9Y2B0|CNPY2_HUMAN;tr|A0A024R6W0|A0A024R6W0_HUMAN;tr|A0A0A0MSS8|A0A0A0MSS8_HUMAN;tr|B2R7C7|B2R7C7_HUMAN;tr|B4DJV2|B4DJV2_HUMAN;tr|Q6FHZ0|Q6FHZ0_HUMAN;tr|V9HW06|V9HW06_HUMAN;tr|V9HWB9|V9HWB9_HUMAN	K00850+K01647+K00813+K00100+K01077+K00026+K00600+K00016
Arrhythmogenic right ventricular cardiomyopathy (ARVC)	9	ko05412	sp|O43707|ACTN4_HUMAN;sp|P05556|ITB1_HUMAN;sp|P15924|DESP_HUMAN;sp|P35221|CTNA1_HUMAN;sp|Q14126|DSG2_HUMAN;sp|Q9Y446|PKP3_HUMAN;tr|A0A024R1X8|A0A024R1X8_HUMAN;tr|A5YM53|A5YM53_HUMAN;tr|B2R627|B2R627_HUMAN	K05699+K05719+K10381+K05691+K07597+K12642+K10056+K06487+K06484
Pyrimidine metabolism	8	ko00240	sp|P17812|PYRG1_HUMAN;sp|P33316|DUT_HUMAN;tr|A0A024R8N6|A0A024R8N6_HUMAN;tr|A0A087WWF6|A0A087WWF6_HUMAN;tr|B3KMV5|B3KMV5_HUMAN;tr|E5KRG5|E5KRG5_HUMAN;tr|F8VPD4|F8VPD4_HUMAN;tr|V9HWH6|V9HWH6_HUMAN	K01937+K01520+K00857+K02328+K03008+K00758+K11540+K03783
Endocytosis	7	ko04144	sp|O95782|AP2A1_HUMAN;tr|A0A024R5H1|A0A024R5H1_HUMAN;tr|A0A024R705|A0A024R705_HUMAN;tr|A0A024R732|A0A024R732_HUMAN;tr|A0A024R9N6|A0A024R9N6_HUMAN;tr|D3DUW6|D3DUW6_HUMAN;tr|G5E9L0|G5E9L0_HUMAN	K11824+K13649+K12196+K12477+K01528+K12493
Bacterial invasion of epithelial cells	7	ko05100	sp|P05556|ITB1_HUMAN;sp|P35221|CTNA1_HUMAN;sp|P46109|CRKL_HUMAN;tr|A4D2P0|A4D2P0_HUMAN;tr|B2R627|B2R627_HUMAN;tr|D3DUW6|D3DUW6_HUMAN;tr|V9HWF0|V9HWF0_HUMAN	K05719+K05691+K04438+K04392+K06484+K01528+K06272
Leukocyte transendothelial migration	7	ko04670	sp|O43707|ACTN4_HUMAN;sp|P05556|ITB1_HUMAN;sp|P35221|CTNA1_HUMAN;tr|A0A024R0V4|A0A024R0V4_HUMAN;tr|A0A024RB87|A0A024RB87_HUMAN;tr|A4D2P0|A4D2P0_HUMAN;tr|E7EQR4|E7EQR4_HUMAN	K05699+K05719+K05691+K06274+K07836+K04392+K08007
Phagosome	7	ko04145	sp|P05556|ITB1_HUMAN;sp|P68366|TBA4A_HUMAN;sp|Q14204|DYHC1_HUMAN;tr|A4D2P0|A4D2P0_HUMAN;tr|A5YM53|A5YM53_HUMAN;tr|B2R627|B2R627_HUMAN;tr|Q5SU16|Q5SU16_HUMAN	K05719+K07374+K10413+K04392+K06487+K06484+K07375
Amoebiasis	6	ko05146	sp|O15230|LAMA5_HUMAN;sp|O43707|ACTN4_HUMAN;sp|P63092|GNAS2_HUMAN;sp|Q86VS8|HOOK3_HUMAN;tr|A0A024R972|A0A024R972_HUMAN;tr|V9HW43|V9HW43_HUMAN	K06240+K05699+K04632+K05637+K05635+K04455
Spliceosome	6	ko03040	sp|O00567|NOP56_HUMAN;sp|Q14690|RRP5_HUMAN;sp|Q6P2Q9|PRP8_HUMAN;tr|B2R6F3|B2R6F3_HUMAN;tr|Q53G61|Q53G61_HUMAN;tr|Q59ER5|Q59ER5_HUMAN	K12844+K12869+K12867+K12856+K12892+K11092+K12662
Viral myocarditis	6	ko05416	sp|P78344|IF4G2_HUMAN;tr|A0A024R1N1|A0A024R1N1_HUMAN;tr|A4D2P0|A4D2P0_HUMAN;tr|B2R6E2|B2R6E2_HUMAN;tr|E7EX73|E7EX73_HUMAN;tr|H7BY55|H7BY55_HUMAN	K03260+K10352+K04392+K04006
Huntington's disease	6	ko05016	sp|O95782|AP2A1_HUMAN;tr|A0A024R732|A0A024R732_HUMAN;tr|B3KMV5|B3KMV5_HUMAN;tr|E5KRK5|E5KRK5_HUMAN;tr|E7EX90|E7EX90_HUMAN;tr|V9HW31|V9HW31_HUMAN	K11824+K11828+K03008+K03934+K04648+K02133
Small cell lung cancer	6	ko05222	sp|O15230|LAMA5_HUMAN;sp|P05556|ITB1_HUMAN;sp|Q86VS8|HOOK3_HUMAN;tr|A0A024R972|A0A024R972_HUMAN;tr|A5YM53|A5YM53_HUMAN;tr|G3V5T9|G3V5T9_HUMAN	K06240+K05719+K05637+K05635+K06487+K02206
Dilated cardiomyopathy	6	ko05414	sp|P05556|ITB1_HUMAN;sp|P63092|GNAS2_HUMAN;tr|A5YM53|A5YM53_HUMAN;tr|B2R627|B2R627_HUMAN;tr|B2RDE1|B2RDE1_HUMAN;tr|D9YZV5|D9YZV5_HUMAN	K05719+K04632+K06487+K06484+K09290+K10373+K10374
Pathogenic Escherichia coli infection	6	ko05130	sp|P05556|ITB1_HUMAN;sp|P68366|TBA4A_HUMAN;sp|Q15020|SART3_HUMAN;sp|Q92974|ARHG2_HUMAN;tr|E7EQR4|E7EQR4_HUMAN;tr|Q5SU16|Q5SU16_HUMAN	K05719+K07374+K11294+K12791+K08007+K07375
ECM-receptor interaction	6	ko04512	sp|O15230|LAMA5_HUMAN;sp|P05556|ITB1_HUMAN;sp|Q86VS8|HOOK3_HUMAN;tr|A0A024R972|A0A024R972_HUMAN;tr|A5YM53|A5YM53_HUMAN;tr|B2R627|B2R627_HUMAN	K06240+K05719+K05637+K05635+K06487+K06484
Adherens junction	6	ko04520	sp|O43707|ACTN4_HUMAN;sp|P10586|PTPRF_HUMAN;sp|P35221|CTNA1_HUMAN;sp|Q15417|CNN3_HUMAN;tr|A4D2P0|A4D2P0_HUMAN;tr|A8K3M3|A8K3M3_HUMAN	K05699+K05695+K05691+K06084+K04392+K05696
MAPK signaling pathway	5	ko04010	sp|P21333|FLNA_HUMAN;sp|P46109|CRKL_HUMAN;tr|A0A024RB87|A0A024RB87_HUMAN;tr|A4D2P0|A4D2P0_HUMAN;tr|V9HW43|V9HW43_HUMAN	K04437+K04438+K07836+K04392+K04455
Cell adhesion molecules (CAMs)	5	ko04514	sp|P05556|ITB1_HUMAN;sp|P10586|PTPRF_HUMAN;sp|Q92896|GSLG1_HUMAN;tr|A5YM53|A5YM53_HUMAN;tr|Q7Z3Z9|Q7Z3Z9_HUMAN	K05719+K05695+K06816+K06487+K06550
Hypertrophic cardiomyopathy (HCM)	5	ko05410	sp|P05556|ITB1_HUMAN;tr|A5YM53|A5YM53_HUMAN;tr|B2R627|B2R627_HUMAN;tr|B2RDE1|B2RDE1_HUMAN;tr|D9YZV5|D9YZV5_HUMAN	K05719+K06487+K06484+K09290+K10373+K10374
Pancreatic secretion	5	ko04972	sp|P05023|AT1A1_HUMAN;sp|P54709|AT1B3_HUMAN;sp|P63092|GNAS2_HUMAN;tr|A0A024RB87|A0A024RB87_HUMAN;tr|A4D2P0|A4D2P0_HUMAN	K01539+K01540+K04632+K07836+K04392
Purine metabolism	4	ko00230	sp|Q96AG4|LRC59_HUMAN;tr|A0A087WWF6|A0A087WWF6_HUMAN;tr|B3KMV5|B3KMV5_HUMAN;tr|V9HWH6|V9HWH6_HUMAN	K01768+K02328+K03008+K03783
Toxoplasmosis	4	ko05145	sp|O15230|LAMA5_HUMAN;sp|P05556|ITB1_HUMAN;sp|Q86VS8|HOOK3_HUMAN;tr|A0A024R972|A0A024R972_HUMAN	K06240+K05719+K05637+K05635
Cardiac muscle contraction	4	ko04260	sp|P05023|AT1A1_HUMAN;sp|P54709|AT1B3_HUMAN;tr|B2RDE1|B2RDE1_HUMAN;tr|D9YZV5|D9YZV5_HUMAN	K01539+K01540+K09290+K10373+K10374
Gastric acid secretion	4	ko04971	sp|P05023|AT1A1_HUMAN;sp|P54709|AT1B3_HUMAN;sp|P63092|GNAS2_HUMAN;tr|E7EQR4|E7EQR4_HUMAN	K01539+K01540+K04632+K08007
Fc gamma R-mediated phagocytosis	4	ko04666	sp|P46109|CRKL_HUMAN;tr|A0A024R0V4|A0A024R0V4_HUMAN;tr|A4D2P0|A4D2P0_HUMAN;tr|D3DUW6|D3DUW6_HUMAN	K04438+K06274+K04392+K01528
Insulin signaling pathway	4	ko04910	sp|P10586|PTPRF_HUMAN;sp|P11216|PYGB_HUMAN;sp|P46109|CRKL_HUMAN;tr|A8K3M3|A8K3M3_HUMAN	K05695+K00688+K04438+K05696
Glyoxylate and dicarboxylate metabolism	4	ko00630	sp|Q9Y2B0|CNPY2_HUMAN;tr|A0A087WVM4|A0A087WVM4_HUMAN;tr|B4DJV2|B4DJV2_HUMAN;tr|Q6FHZ0|Q6FHZ0_HUMAN	K01647+K13402+K00026
Shigellosis	4	ko05131	sp|P05556|ITB1_HUMAN;sp|P46109|CRKL_HUMAN;tr|A4D2P0|A4D2P0_HUMAN;tr|B2R627|B2R627_HUMAN	K05719+K04438+K04392+K06484
Aminoacyl-tRNA biosynthesis	4	ko00970	tr|A0A024RCN6|A0A024RCN6_HUMAN;tr|A8K3A8|A8K3A8_HUMAN;tr|B2RBS8|B2RBS8_HUMAN;tr|M0QWZ7|M0QWZ7_HUMAN	K01873+K01886+K01883+K01875
Vasopressin-regulated water reabsorption	4	ko04962	sp|P46459|NSF_HUMAN;sp|P63092|GNAS2_HUMAN;sp|Q14204|DYHC1_HUMAN;tr|E7EX90|E7EX90_HUMAN	K06027+K04632+K10413+K04648
Arginine and proline metabolism	4	ko00330	sp|O15460|P4HA2_HUMAN;sp|P54886|P5CS_HUMAN;tr|A0A024R6W0|A0A024R6W0_HUMAN;tr|Q8TBI1|Q8TBI1_HUMAN	K00472+K12657+K00813+K00274
Proteasome	4	ko03050	sp|P28070|PSB4_HUMAN;sp|Q13200|PSMD2_HUMAN;tr|B2RD27|B2RD27_HUMAN;tr|Q53XL8|Q53XL8_HUMAN	K02736+K03028+K03038+K03062
RNA degradation	4	ko03018	sp|O95453|PARN_HUMAN;sp|P26196|DDX6_HUMAN;sp|Q96AG4|LRC59_HUMAN;tr|Q59ER5|Q59ER5_HUMAN	K01148+K12614+K12603+K12602
Renal cell carcinoma	3	ko05211	sp|P46109|CRKL_HUMAN;tr|A0A024RB87|A0A024RB87_HUMAN;tr|A4D2P0|A4D2P0_HUMAN	K04438+K07836+K04392
Gap junction	3	ko04540	sp|P63092|GNAS2_HUMAN;sp|P68366|TBA4A_HUMAN;tr|Q5SU16|Q5SU16_HUMAN	K04632+K07374+K07375
Bile secretion	3	ko04976	sp|P05023|AT1A1_HUMAN;sp|P54709|AT1B3_HUMAN;sp|P63092|GNAS2_HUMAN	K01539+K01540+K04632
Axon guidance	3	ko04360	sp|P05556|ITB1_HUMAN;tr|A4D2P0|A4D2P0_HUMAN;tr|Q7Z3Z9|Q7Z3Z9_HUMAN	K05719+K04392+K06550
N-Glycan biosynthesis	3	ko00510	sp|P04843|RPN1_HUMAN;sp|P46977|STT3A_HUMAN;tr|V9HWJ0|V9HWJ0_HUMAN	K12666+K07151+K05546
Cysteine and methionine metabolism	3	ko00270	tr|A0A024R6W0|A0A024R6W0_HUMAN;tr|B4DST3|B4DST3_HUMAN;tr|V9HWB9|V9HWB9_HUMAN	K00813+K00548+K00016
Chemokine signaling pathway	3	ko04062	sp|P46109|CRKL_HUMAN;tr|A0A024RB87|A0A024RB87_HUMAN;tr|A4D2P0|A4D2P0_HUMAN	K04438+K07836+K04392
Phosphatidylinositol signaling system	3	ko04070	sp|O15357|SHIP2_HUMAN;tr|B3KMV5|B3KMV5_HUMAN;tr|F5GWN5|F5GWN5_HUMAN	K01106+K00923
Tyrosine metabolism	3	ko00350	sp|Q96IR7|HPDL_HUMAN;tr|A0A024R6W0|A0A024R6W0_HUMAN;tr|Q8TBI1|Q8TBI1_HUMAN	K00457+K00813+K00274
Homologous recombination	3	ko03440	sp|Q86VS8|HOOK3_HUMAN;tr|A0A087WWF6|A0A087WWF6_HUMAN;tr|F8W7U8|F8W7U8_HUMAN	K10873+K02328+K10865
Salivary secretion	3	ko04970	sp|P05023|AT1A1_HUMAN;sp|P54709|AT1B3_HUMAN;sp|P63092|GNAS2_HUMAN	K01539+K01540+K04632
Lysine degradation	3	ko00310	sp|O60568|PLOD3_HUMAN;sp|Q8NBJ5|GT251_HUMAN;tr|B2R5M9|B2R5M9_HUMAN	K13646+K11703+K00473
Inositol phosphate metabolism	3	ko00562	sp|O15357|SHIP2_HUMAN;tr|B3KMV5|B3KMV5_HUMAN;tr|F5GWN5|F5GWN5_HUMAN	K01106+K00923
Neurotrophin signaling pathway	3	ko04722	sp|P46109|CRKL_HUMAN;tr|A0A024RB87|A0A024RB87_HUMAN;tr|A4D2P0|A4D2P0_HUMAN	K04438+K07836+K04392
Hematopoietic cell lineage	3	ko04640	tr|B2R627|B2R627_HUMAN;tr|E9PR17|E9PR17_HUMAN;tr|H7BY55|H7BY55_HUMAN	K06484+K04008+K04006
Citrate cycle (TCA cycle)	3	ko00020	sp|Q9Y2B0|CNPY2_HUMAN;tr|B4DJV2|B4DJV2_HUMAN;tr|Q6FHZ0|Q6FHZ0_HUMAN	K01647+K00026
Phenylalanine metabolism	3	ko00360	sp|Q96IR7|HPDL_HUMAN;tr|A0A024R6W0|A0A024R6W0_HUMAN;tr|Q8TBI1|Q8TBI1_HUMAN	K00457+K00813+K00274
Tight junction	3	ko04530	sp|O43707|ACTN4_HUMAN;sp|P35221|CTNA1_HUMAN;tr|A0A024R1N1|A0A024R1N1_HUMAN	K05699+K05691+K10352
One carbon pool by folate	3	ko00670	tr|A0A087WVM4|A0A087WVM4_HUMAN;tr|B4DST3|B4DST3_HUMAN;tr|V9HW06|V9HW06_HUMAN	K13402+K00548+K00600
Ubiquitin mediated proteolysis	3	ko04120	sp|O95071|UBR5_HUMAN;sp|Q9H9B4|SFXN1_HUMAN;tr|A0A024R9U8|A0A024R9U8_HUMAN	K10593+K03351+K10592
Drug metabolism - other enzymes	2	ko00983	tr|A0A024R8N6|A0A024R8N6_HUMAN;tr|E5KRG5|E5KRG5_HUMAN	K00857+K00758
Systemic lupus erythematosus	2	ko05322	sp|O43707|ACTN4_HUMAN;tr|B2R4R0|B2R4R0_HUMAN	K05699+K11254
Cell cycle - yeast	2	ko04111	sp|Q9H9B4|SFXN1_HUMAN;tr|B3KMS0|B3KMS0_HUMAN	K03351+K06677
Methane metabolism	2	ko00680	sp|Q01813|PFKAP_HUMAN;tr|V9HW06|V9HW06_HUMAN	K00850+K00600
Vascular smooth muscle contraction	2	ko04270	sp|P63092|GNAS2_HUMAN;tr|A0A024R0Q5|A0A024R0Q5_HUMAN	K04632+K06270+K12329
NOD-like receptor signaling pathway	2	ko04621	tr|A0A024RC87|A0A024RC87_HUMAN;tr|V9HWP2|V9HWP2_HUMAN	K12800+K09487
Protein digestion and absorption	2	ko04974	sp|P05023|AT1A1_HUMAN;sp|P54709|AT1B3_HUMAN	K01539+K01540
Isoquinoline alkaloid biosynthesis	2	ko00950	tr|A0A024R6W0|A0A024R6W0_HUMAN;tr|Q8TBI1|Q8TBI1_HUMAN	K00813+K00274
Vibrio cholerae infection	2	ko05110	sp|P63092|GNAS2_HUMAN;tr|A0A090N8Y2|A0A090N8Y2_HUMAN	K04632+K09582
p53 signaling pathway	2	ko04115	sp|Q96AG4|LRC59_HUMAN;tr|G3V5T9|G3V5T9_HUMAN	K10130+K02206
Pyruvate metabolism	2	ko00620	tr|Q6FHZ0|Q6FHZ0_HUMAN;tr|V9HWB9|V9HWB9_HUMAN	K00026+K00016
Endometrial cancer	2	ko05213	sp|P35221|CTNA1_HUMAN;tr|V9HWF0|V9HWF0_HUMAN	K05691+K06272
Glycine, serine and threonine metabolism	2	ko00260	tr|Q8TBI1|Q8TBI1_HUMAN;tr|V9HW06|V9HW06_HUMAN	K00274+K00600
Aldosterone-regulated sodium reabsorption	2	ko04960	sp|P05023|AT1A1_HUMAN;sp|P54709|AT1B3_HUMAN	K01539+K01540
Parkinson's disease	2	ko05012	tr|E5KRK5|E5KRK5_HUMAN;tr|V9HW31|V9HW31_HUMAN	K03934+K02133
Prostate cancer	2	ko05215	tr|G3V5T9|G3V5T9_HUMAN;tr|V9HWP2|V9HWP2_HUMAN	K02206+K09487
Oxidative phosphorylation	2	ko00190	tr|E5KRK5|E5KRK5_HUMAN;tr|V9HW31|V9HW31_HUMAN	K03934+K02133
Carbohydrate digestion and absorption	2	ko04973	sp|P05023|AT1A1_HUMAN;sp|P54709|AT1B3_HUMAN	K01539+K01540
Glycolysis / Gluconeogenesis	2	ko00010	sp|Q01813|PFKAP_HUMAN;tr|V9HWB9|V9HWB9_HUMAN	K00850+K00016
Arachidonic acid metabolism	2	ko00590	tr|A0A087X1J7|A0A087X1J7_HUMAN;tr|A0A0A0MSS8|A0A0A0MSS8_HUMAN	K00432+K04119
Alzheimer's disease	2	ko05010	tr|E5KRK5|E5KRK5_HUMAN;tr|V9HW31|V9HW31_HUMAN	K03934+K02133
VEGF signaling pathway	2	ko04370	tr|A4D2P0|A4D2P0_HUMAN;tr|V9HW43|V9HW43_HUMAN	K04392+K04455
Progesterone-mediated oocyte maturation	2	ko04914	sp|Q9H9B4|SFXN1_HUMAN;tr|G3V5T9|G3V5T9_HUMAN	K03351+K02206
Other types of O-glycan biosynthesis	2	ko00514	sp|O60568|PLOD3_HUMAN;sp|Q8NBJ5|GT251_HUMAN	K13646+K11703
Alanine, aspartate and glutamate metabolism	2	ko00250	tr|A0A024R6W0|A0A024R6W0_HUMAN;tr|F8VPD4|F8VPD4_HUMAN	K00813+K11540
Prion diseases	2	ko05020	tr|A0A024R972|A0A024R972_HUMAN;tr|V9HWB4|V9HWB4_HUMAN	K05635+K09490
Meiosis - yeast	2	ko04113	sp|Q96AG4|LRC59_HUMAN;sp|Q9H9B4|SFXN1_HUMAN	K01768+K03351
Complement and coagulation cascades	2	ko04610	tr|E9PR17|E9PR17_HUMAN;tr|H7BY55|H7BY55_HUMAN	K04008+K04006
Oocyte meiosis	2	ko04114	sp|Q9H9B4|SFXN1_HUMAN;tr|G3V5T9|G3V5T9_HUMAN	K03351+K02206
Fructose and mannose metabolism	2	ko00051	sp|Q01813|PFKAP_HUMAN;tr|A0A0A0MSS8|A0A0A0MSS8_HUMAN	K00850+K00100
Proximal tubule bicarbonate reclamation	2	ko04964	sp|P05023|AT1A1_HUMAN;sp|P54709|AT1B3_HUMAN	K01539+K01540
Long-term potentiation	2	ko04720	tr|A0A024R0Q5|A0A024R0Q5_HUMAN;tr|A0A024RB87|A0A024RB87_HUMAN	K06270+K07836
Cell cycle	2	ko04110	sp|Q9H9B4|SFXN1_HUMAN;tr|G3V5T9|G3V5T9_HUMAN	K03351+K02206
Carbon fixation in photosynthetic organisms	2	ko00710	tr|A0A024R6W0|A0A024R6W0_HUMAN;tr|Q6FHZ0|Q6FHZ0_HUMAN	K00813+K00026
Antigen processing and presentation	2	ko04612	sp|P34932|HSP74_HUMAN;tr|V9HVY3|V9HVY3_HUMAN	K09489+K08056
Natural killer cell mediated cytotoxicity	1	ko04650	tr|A4D2P0|A4D2P0_HUMAN	K04392
ErbB signaling pathway	1	ko04012	sp|P46109|CRKL_HUMAN	K04438
Linoleic acid metabolism	1	ko00591	tr|A0A0A0MSS8|A0A0A0MSS8_HUMAN	K00100
PPAR signaling pathway	1	ko03320	tr|V9HWF0|V9HWF0_HUMAN	K06272
Porphyrin and chlorophyll metabolism	1	ko00860	tr|Q6NS36|Q6NS36_HUMAN	K00522
Toll-like receptor signaling pathway	1	ko04620	tr|A4D2P0|A4D2P0_HUMAN	K04392
Osteoclast differentiation	1	ko04380	tr|A4D2P0|A4D2P0_HUMAN	K04392
Protein export	1	ko03060	tr|V9HWB4|V9HWB4_HUMAN	K09490
Chagas disease	1	ko05142	sp|P63092|GNAS2_HUMAN	K04632
Melanogenesis	1	ko04916	sp|P63092|GNAS2_HUMAN	K04632
Calcium signaling pathway	1	ko04020	sp|P63092|GNAS2_HUMAN	K04632
Primary bile acid biosynthesis	1	ko00120	tr|A0A0A0MSS8|A0A0A0MSS8_HUMAN	K00037
Histidine metabolism	1	ko00340	tr|Q8TBI1|Q8TBI1_HUMAN	K00274
Metabolism of xenobiotics by cytochrome P450	1	ko00980	tr|A0A0A0MSS8|A0A0A0MSS8_HUMAN	K00212
Leishmaniasis	1	ko05140	sp|P05556|ITB1_HUMAN	K05719
Aminobenzoate degradation	1	ko00627	tr|B2R7C7|B2R7C7_HUMAN	K01077
Propanoate metabolism	1	ko00640	tr|V9HWB9|V9HWB9_HUMAN	K00016
Acute myeloid leukemia	1	ko05221	tr|A0A024R1X8|A0A024R1X8_HUMAN	K10056
Glutathione metabolism	1	ko00480	tr|A0A087X1J7|A0A087X1J7_HUMAN	K00432
Tryptophan metabolism	1	ko00380	tr|Q8TBI1|Q8TBI1_HUMAN	K00274
Nucleotide excision repair	1	ko03420	tr|A0A087WWF6|A0A087WWF6_HUMAN	K02328
Galactose metabolism	1	ko00052	sp|Q01813|PFKAP_HUMAN	K00850
Fc epsilon RI signaling pathway	1	ko04664	tr|A4D2P0|A4D2P0_HUMAN	K04392
Phototransduction	1	ko04744	tr|Q6FGY1|Q6FGY1_HUMAN	K13764
Plant-pathogen interaction	1	ko04626	tr|V9HWP2|V9HWP2_HUMAN	K09487
Two-component system	1	ko02020	tr|B2R7C7|B2R7C7_HUMAN	K01077
B cell receptor signaling pathway	1	ko04662	tr|A4D2P0|A4D2P0_HUMAN	K04392
Base excision repair	1	ko03410	tr|A0A087WWF6|A0A087WWF6_HUMAN	K02328
Thyroid cancer	1	ko05216	tr|B2RDE1|B2RDE1_HUMAN	K09290
Drug metabolism - cytochrome P450	1	ko00982	tr|Q8TBI1|Q8TBI1_HUMAN	K00274
Pentose phosphate pathway	1	ko00030	sp|Q01813|PFKAP_HUMAN	K00850
Starch and sucrose metabolism	1	ko00500	sp|P11216|PYGB_HUMAN	K00688
Mismatch repair	1	ko03430	tr|A0A087WWF6|A0A087WWF6_HUMAN	K02328
GnRH signaling pathway	1	ko04912	sp|P63092|GNAS2_HUMAN	K04632
Tropane, piperidine and pyridine alkaloid biosynthesis	1	ko00960	tr|A0A024R6W0|A0A024R6W0_HUMAN	K00813
Colorectal cancer	1	ko05210	tr|A4D2P0|A4D2P0_HUMAN	K04392
Chloroalkane and chloroalkene degradation	1	ko00625	tr|A0A0A0MSS8|A0A0A0MSS8_HUMAN	K00100
Bisphenol degradation	1	ko00363	tr|A0A0A0MSS8|A0A0A0MSS8_HUMAN	K00100
Steroid hormone biosynthesis	1	ko00140	tr|A0A0A0MSS8|A0A0A0MSS8_HUMAN	K00089+K00037+K05295
Wnt signaling pathway	1	ko04310	tr|A4D2P0|A4D2P0_HUMAN	K04392
Fatty acid metabolism	1	ko00071	sp|P49748|ACADV_HUMAN	K09479
Folate biosynthesis	1	ko00790	tr|B2R7C7|B2R7C7_HUMAN	K01077
Phenylalanine, tyrosine and tryptophan biosynthesis	1	ko00400	tr|A0A024R6W0|A0A024R6W0_HUMAN	K00813
Butanoate metabolism	1	ko00650	tr|A0A0A0MSS8|A0A0A0MSS8_HUMAN	K00100
Epithelial cell signaling in Helicobacter pylori infection	1	ko05120	tr|A4D2P0|A4D2P0_HUMAN	K04392
Bladder cancer	1	ko05219	tr|E5KRG5|E5KRG5_HUMAN	K00758
Notch signaling pathway	1	ko04330	tr|C9JE98|C9JE98_HUMAN	K06065
Long-term depression	1	ko04730	sp|P63092|GNAS2_HUMAN	K04632
DNA replication	1	ko03030	tr|A0A087WWF6|A0A087WWF6_HUMAN	K02328
Non-homologous end-joining	1	ko03450	tr|F8W7U8|F8W7U8_HUMAN	K10865
Ubiquinone and other terpenoid-quinone biosynthesis	1	ko00130	sp|Q96IR7|HPDL_HUMAN	K00457
Nicotinate and nicotinamide metabolism	1	ko00760	tr|V9HWH6|V9HWH6_HUMAN	K03783
RNA polymerase	1	ko03020	tr|B3KMV5|B3KMV5_HUMAN	K03008
Amyotrophic lateral sclerosis (ALS)	1	ko05014	tr|A4D2P0|A4D2P0_HUMAN	K04392
Cyanoamino acid metabolism	1	ko00460	tr|V9HW06|V9HW06_HUMAN	K00600
Taste transduction	1	ko04742	sp|P63092|GNAS2_HUMAN	K04632
Valine, leucine and isoleucine biosynthesis	1	ko00290	tr|A0A024RCN6|A0A024RCN6_HUMAN	K01873
Vitamin B6 metabolism	1	ko00750	tr|V9HWC3|V9HWC3_HUMAN	K00868
Novobiocin biosynthesis	1	ko00401	tr|A0A024R6W0|A0A024R6W0_HUMAN	K00813
Olfactory transduction	1	ko04740	tr|Q53GR7|Q53GR7_HUMAN	K04257
Chronic myeloid leukemia	1	ko05220	sp|P46109|CRKL_HUMAN	K04438
Pancreatic cancer	1	ko05212	tr|A4D2P0|A4D2P0_HUMAN	K04392
Down-regulated
Metabolic pathways	30	ko01100	sp|O14561|ACPM_HUMAN;sp|P07814|SYEP_HUMAN;sp|P07954|FUMH_HUMAN;sp|P14324|FPPS_HUMAN;sp|P24752|THIL_HUMAN;sp|P32929|CGL_HUMAN;sp|P43034|LIS1_HUMAN;sp|P60174|TPIS_HUMAN;sp|Q15738|NSDHL_HUMAN;sp|Q16850|CP51A_HUMAN;sp|Q9BWD1|THIC_HUMAN;tr|A0A024R4F1|A0A024R4F1_HUMAN;tr|A0A024R6C9|A0A024R6C9_HUMAN;tr|A0A024R6G4|A0A024R6G4_HUMAN;tr|A0A024R713|A0A024R713_HUMAN;tr|A0A024RAJ6|A0A024RAJ6_HUMAN;tr|A0A0A0MT8…	K03955+K14163+K01679+K00787+K00626+K01758+K01062+K01803+K07748+K05917+K01689+K00658+K00140+K00382+K12373+K00253+K00036+K01840+K01951+K00261+K00940+K00128+K00031+K01948+K01940+K00016+K01641+K00615+K00927
Biosynthesis of secondary metabolites	20	ko01110	sp|P07814|SYEP_HUMAN;sp|P07954|FUMH_HUMAN;sp|P14324|FPPS_HUMAN;sp|P24752|THIL_HUMAN;sp|P60174|TPIS_HUMAN;sp|Q16850|CP51A_HUMAN;sp|Q9BWD1|THIC_HUMAN;tr|A0A024R4F1|A0A024R4F1_HUMAN;tr|A0A024R6C9|A0A024R6C9_HUMAN;tr|A0A024R713|A0A024R713_HUMAN;tr|A8K8D9|A8K8D9_HUMAN;tr|B2R6D4|B2R6D4_HUMAN;tr|Q32Q12|Q32Q12_HUMAN;tr|Q53FB6|Q53FB6_HUMAN;tr|Q53GL5|Q53GL5_HUMAN;tr|Q5T6L4|Q5T6L4_HUMAN;tr|Q5U077|Q5U077_HUM…	K14163+K01679+K00787+K00626+K01803+K05917+K01689+K00658+K00382+K00036+K01840+K00940+K00128+K00031+K01940+K00016+K01641+K00615+K00927
Microbial metabolism in diverse environments	14	ko01120	sp|P07954|FUMH_HUMAN;sp|P24752|THIL_HUMAN;sp|P60174|TPIS_HUMAN;sp|Q9BWD1|THIC_HUMAN;tr|A0A024R4F1|A0A024R4F1_HUMAN;tr|A0A024R6C9|A0A024R6C9_HUMAN;tr|A0A024R713|A0A024R713_HUMAN;tr|A8K8D9|A8K8D9_HUMAN;tr|Q53FB6|Q53FB6_HUMAN;tr|Q53GL5|Q53GL5_HUMAN;tr|Q59EH3|Q59EH3_HUMAN;tr|Q5U077|Q5U077_HUMAN;tr|V9HWD9|V9HWD9_HUMAN;tr|V9HWF4|V9HWF4_HUMAN	K01679+K00626+K01803+K01689+K00658+K00382+K00036+K00128+K00031+K01078+K00016+K00615+K00927
Ribosome	10	ko03010	sp|P23396|RS3_HUMAN;sp|P39023|RL3_HUMAN;sp|P42677|RS27_HUMAN;sp|P61254|RL26_HUMAN;sp|P62750|RL23A_HUMAN;sp|P62917|RL8_HUMAN;tr|A2RUM7|A2RUM7_HUMAN;tr|B2R4C1|B2R4C1_HUMAN;tr|F8W727|F8W727_HUMAN;tr|Q6IPI1|Q6IPI1_HUMAN	K02985+K02925+K02978+K02898+K02893+K02938+K02932+K02910+K02912+K02905
RNA transport	7	ko03013	sp|P49792|RBP2_HUMAN;sp|Q9H307|PININ_HUMAN;tr|A0A024R8W0|A0A024R8W0_HUMAN;tr|E7EX17|E7EX17_HUMAN;tr|Q53HQ7|Q53HQ7_HUMAN;tr|Q5U0F4|Q5U0F4_HUMAN;tr|X6RAL5|X6RAL5_HUMAN	K12172+K13114+K13025+K03258+K03231+K03246+K14324
Spliceosome	7	ko03040	sp|P38159|RBMX_HUMAN;sp|Q16629|SRSF7_HUMAN;tr|A0A024QZD5|A0A024QZD5_HUMAN;tr|A0A024R8W0|A0A024R8W0_HUMAN;tr|B2R5W2|B2R5W2_HUMAN;tr|B4DLR3|B4DLR3_HUMAN;tr|Q59GA1|Q59GA1_HUMAN	K12885+K12896+K11093+K13025+K12884+K12888+K12897
Valine, leucine and isoleucine degradation	7	ko00280	sp|P24752|THIL_HUMAN;sp|Q9BWD1|THIC_HUMAN;tr|A0A024R6G4|A0A024R6G4_HUMAN;tr|A0A024R713|A0A024R713_HUMAN;tr|A0A0A0MT83|A0A0A0MT83_HUMAN;tr|Q53FB6|Q53FB6_HUMAN;tr|Q8N995|Q8N995_HUMAN	K00626+K00140+K00382+K00253+K00128+K01641
Glycolysis / Gluconeogenesis	6	ko00010	sp|P60174|TPIS_HUMAN;tr|A0A024R4F1|A0A024R4F1_HUMAN;tr|A0A024R713|A0A024R713_HUMAN;tr|Q53FB6|Q53FB6_HUMAN;tr|Q5U077|Q5U077_HUMAN;tr|V9HWF4|V9HWF4_HUMAN	K01803+K01689+K00382+K00128+K00016+K00927
Propanoate metabolism	5	ko00640	sp|P24752|THIL_HUMAN;sp|Q9BWD1|THIC_HUMAN;tr|A0A024R6G4|A0A024R6G4_HUMAN;tr|Q53FB6|Q53FB6_HUMAN;tr|Q5U077|Q5U077_HUMAN	K00626+K00140+K00128+K00016
Pyruvate metabolism	5	ko00620	sp|P24752|THIL_HUMAN;sp|Q9BWD1|THIC_HUMAN;tr|A0A024R713|A0A024R713_HUMAN;tr|Q53FB6|Q53FB6_HUMAN;tr|Q5U077|Q5U077_HUMAN	K00626+K00382+K00128+K00016
Lysine degradation	4	ko00310	sp|P24752|THIL_HUMAN;sp|Q9BWD1|THIC_HUMAN;tr|A0A024R6C9|A0A024R6C9_HUMAN;tr|Q53FB6|Q53FB6_HUMAN	K00626+K00658+K00128
Terpenoid backbone biosynthesis	4	ko00900	sp|P14324|FPPS_HUMAN;sp|P24752|THIL_HUMAN;sp|Q9BWD1|THIC_HUMAN;tr|Q8N995|Q8N995_HUMAN	K00787+K00626+K01641
Arginine and proline metabolism	4	ko00330	tr|E9KL48|E9KL48_HUMAN;tr|Q53FB6|Q53FB6_HUMAN;tr|Q5R210|Q5R210_HUMAN;tr|Q5T6L4|Q5T6L4_HUMAN	K00261+K00128+K01948+K01940
Tryptophan metabolism	4	ko00380	sp|P24752|THIL_HUMAN;sp|Q9BWD1|THIC_HUMAN;tr|A0A024R6K8|A0A024R6K8_HUMAN;tr|Q53FB6|Q53FB6_HUMAN	K00626+K01867+K00128
Citrate cycle (TCA cycle)	4	ko00020	sp|P07954|FUMH_HUMAN;tr|A0A024R6C9|A0A024R6C9_HUMAN;tr|A0A024R713|A0A024R713_HUMAN;tr|Q53GL5|Q53GL5_HUMAN	K01679+K00658+K00382+K00031
Peroxisome	3	ko04146	sp|Q06830|PRDX1_HUMAN;tr|Q53GL5|Q53GL5_HUMAN;tr|Q7Z7M4|Q7Z7M4_HUMAN	K13279+K00031+K04564
Systemic lupus erythematosus	3	ko05322	sp|Q5SSJ5|HP1B3_HUMAN;sp|Q71DI3|H32_HUMAN;tr|A0A024QZZ7|A0A024QZZ7_HUMAN	K11252+K11253
Huntington's disease	3	ko05016	sp|O14561|ACPM_HUMAN;tr|Q6LES8|Q6LES8_HUMAN;tr|Q7Z7M4|Q7Z7M4_HUMAN	K03955+K11830+K04564
Neurotrophin signaling pathway	3	ko04722	tr|A0A024R9Y7|A0A024R9Y7_HUMAN;tr|H0Y7A7|H0Y7A7_HUMAN;tr|J3QQX2|J3QQX2_HUMAN	K12464+K02183+K12462
Protein processing in endoplasmic reticulum	3	ko04141	sp|P27824|CALX_HUMAN;tr|A8K7T4|A8K7T4_HUMAN;tr|Q53HT6|Q53HT6_HUMAN	K08054+K10082+K14009
Fatty acid metabolism	3	ko00071	sp|P24752|THIL_HUMAN;sp|Q9BWD1|THIC_HUMAN;tr|Q53FB6|Q53FB6_HUMAN	K00626+K00128
Butanoate metabolism	3	ko00650	sp|P24752|THIL_HUMAN;sp|Q9BWD1|THIC_HUMAN;tr|Q8N995|Q8N995_HUMAN	K00626+K01641
mRNA surveillance pathway	3	ko03015	sp|Q9H307|PININ_HUMAN;tr|A0A024R8W0|A0A024R8W0_HUMAN;tr|X6RAL5|X6RAL5_HUMAN	K13114+K13025+K14324
Nitrogen metabolism	3	ko00910	sp|P32929|CGL_HUMAN;tr|E9KL48|E9KL48_HUMAN;tr|Q5R210|Q5R210_HUMAN	K01758+K00261+K01948
Aminoacyl-tRNA biosynthesis	3	ko00970	sp|P07814|SYEP_HUMAN;sp|P49588|SYAC_HUMAN;tr|A0A024R6K8|A0A024R6K8_HUMAN	K14163+K01872+K01867
Alanine, aspartate and glutamate metabolism	3	ko00250	tr|E9KL48|E9KL48_HUMAN;tr|Q5R210|Q5R210_HUMAN;tr|Q5T6L4|Q5T6L4_HUMAN	K00261+K01948+K01940
Glutathione metabolism	3	ko00480	tr|A8K8D9|A8K8D9_HUMAN;tr|Q53GL5|Q53GL5_HUMAN;tr|Q6FGJ9|Q6FGJ9_HUMAN	K00036+K00031+K00799
Synthesis and degradation of ketone bodies	3	ko00072	sp|P24752|THIL_HUMAN;sp|Q9BWD1|THIC_HUMAN;tr|Q8N995|Q8N995_HUMAN	K00626+K01641
Proteasome	3	ko03050	sp|P25789|PSA4_HUMAN;sp|Q06323|PSME1_HUMAN;tr|Q86SZ7|Q86SZ7_HUMAN	K02728+K06696+K06697
Carbon fixation in photosynthetic organisms	3	ko00710	sp|P60174|TPIS_HUMAN;tr|V9HWD9|V9HWD9_HUMAN;tr|V9HWF4|V9HWF4_HUMAN	K01803+K00615+K00927
Antigen processing and presentation	3	ko04612	sp|P27824|CALX_HUMAN;sp|Q06323|PSME1_HUMAN;tr|Q86SZ7|Q86SZ7_HUMAN	K08054+K06696+K06697
Base excision repair	3	ko03410	tr|A0A024RDR0|A0A024RDR0_HUMAN;tr|B4E0E1|B4E0E1_HUMAN;tr|Q6FHX6|Q6FHX6_HUMAN	K10802+K10798+K04799
Purine metabolism	2	ko00230	tr|B4DUT7|B4DUT7_HUMAN;tr|Q32Q12|Q32Q12_HUMAN	K01951+K00940
Pentose phosphate pathway	2	ko00030	tr|A8K8D9|A8K8D9_HUMAN;tr|V9HWD9|V9HWD9_HUMAN	K00036+K00615
Benzoate degradation	2	ko00362	sp|P24752|THIL_HUMAN;sp|Q9BWD1|THIC_HUMAN	K00626
Amino sugar and nucleotide sugar metabolism	2	ko00520	tr|A0A024RAJ6|A0A024RAJ6_HUMAN;tr|B2R6D4|B2R6D4_HUMAN	K12373+K01840
Parkinson's disease	2	ko05012	sp|O14561|ACPM_HUMAN;tr|V9HWC2|V9HWC2_HUMAN	K03955+K05687
Porphyrin and chlorophyll metabolism	2	ko00860	sp|P07814|SYEP_HUMAN;sp|P53004|BIEA_HUMAN	K14163+K00214
Bacterial invasion of epithelial cells	2	ko05100	tr|J3KNW4|J3KNW4_HUMAN;tr|Q53HG7|Q53HG7_HUMAN	K05760+K06106
Inositol phosphate metabolism	2	ko00562	sp|P60174|TPIS_HUMAN;tr|A0A024R6G4|A0A024R6G4_HUMAN	K01803+K00140
Cysteine and methionine metabolism	2	ko00270	sp|P32929|CGL_HUMAN;tr|Q5U077|Q5U077_HUMAN	K01758+K00016
Alzheimer's disease	2	ko05010	sp|O14561|ACPM_HUMAN;tr|H0Y7A7|H0Y7A7_HUMAN	K03955+K02183
Steroid biosynthesis	2	ko00100	sp|Q15738|NSDHL_HUMAN;sp|Q16850|CP51A_HUMAN	K07748+K05917
Tight junction	2	ko04530	tr|B7Z954|B7Z954_HUMAN;tr|Q53HG7|Q53HG7_HUMAN	K06098+K06106
Pathways in cancer	2	ko05200	sp|P06753|TPM3_HUMAN;sp|P07954|FUMH_HUMAN	K09290+K01679
Oocyte meiosis	2	ko04114	sp|Q14683|SMC1A_HUMAN;tr|H0Y7A7|H0Y7A7_HUMAN	K06636+K02183
Reductive carboxylate cycle (CO2 fixation)	2	ko00720	sp|P07954|FUMH_HUMAN;tr|Q53GL5|Q53GL5_HUMAN	K01679+K00031
Fructose and mannose metabolism	2	ko00051	sp|P60174|TPIS_HUMAN;tr|B2R6D4|B2R6D4_HUMAN	K01803+K01840
Pathogenic Escherichia coli infection	2	ko05130	tr|A0A024R4A0|A0A024R4A0_HUMAN;tr|Q53HG7|Q53HG7_HUMAN	K11294+K06106
Two-component system	2	ko02020	sp|P24752|THIL_HUMAN;sp|Q9BWD1|THIC_HUMAN	K00626
Phagosome	2	ko04145	sp|P02786|TFR1_HUMAN;sp|P27824|CALX_HUMAN	K06503+K08054
Glycine, serine and threonine metabolism	2	ko00260	sp|P32929|CGL_HUMAN;tr|A0A024R713|A0A024R713_HUMAN	K01758+K00382
RNA degradation	2	ko03018	sp|P38646|GRP75_HUMAN;tr|A0A024R4F1|A0A024R4F1_HUMAN	K04043+K01689
Endocytosis	1	ko04144	sp|P02786|TFR1_HUMAN	K06503
Renal cell carcinoma	1	ko05211	sp|P07954|FUMH_HUMAN	K01679
mTOR signaling pathway	1	ko04150	tr|E7EX17|E7EX17_HUMAN	K03258
Glycosphingolipid biosynthesis - ganglio series	1	ko00604	tr|A0A024RAJ6|A0A024RAJ6_HUMAN	K12373
Malaria	1	ko05144	tr|I1VZV6|I1VZV6_HUMAN	K13822
Insulin signaling pathway	1	ko04910	tr|H0Y7A7|H0Y7A7_HUMAN	K02183
Salivary secretion	1	ko04970	tr|H0Y7A7|H0Y7A7_HUMAN	K02183
Drug metabolism - other enzymes	1	ko00983	tr|B4DUT7|B4DUT7_HUMAN	K01951
Cell cycle - yeast	1	ko04111	sp|Q14683|SMC1A_HUMAN	K06636
Selenoamino acid metabolism	1	ko00450	sp|P32929|CGL_HUMAN	K01758
Limonene and pinene degradation	1	ko00903	tr|Q53FB6|Q53FB6_HUMAN	K00128
GnRH signaling pathway	1	ko04912	tr|H0Y7A7|H0Y7A7_HUMAN	K02183
Oxidative phosphorylation	1	ko00190	sp|O14561|ACPM_HUMAN	K03955
Chloroalkane and chloroalkene degradation	1	ko00625	tr|Q53FB6|Q53FB6_HUMAN	K00128
Methane metabolism	1	ko00680	tr|A0A024R4F1|A0A024R4F1_HUMAN	K01689
Hematopoietic cell lineage	1	ko04640	sp|P02786|TFR1_HUMAN	K06503
Protein export	1	ko03060	tr|V9HWK0|V9HWK0_HUMAN	K03108
Melanogenesis	1	ko04916	tr|H0Y7A7|H0Y7A7_HUMAN	K02183
Glycosaminoglycan degradation	1	ko00531	tr|A0A024RAJ6|A0A024RAJ6_HUMAN	K12373
Calcium signaling pathway	1	ko04020	tr|H0Y7A7|H0Y7A7_HUMAN	K02183
Vascular smooth muscle contraction	1	ko04270	tr|H0Y7A7|H0Y7A7_HUMAN	K02183
Amoebiasis	1	ko05146	tr|V9HWH1|V9HWH1_HUMAN	K13963
Ether lipid metabolism	1	ko00565	sp|P43034|LIS1_HUMAN	K01062
Regulation of actin cytoskeleton	1	ko04810	tr|J3KNW4|J3KNW4_HUMAN	K05760
Other glycan degradation	1	ko00511	tr|A0A024RAJ6|A0A024RAJ6_HUMAN	K12373
Histidine metabolism	1	ko00340	tr|Q53FB6|Q53FB6_HUMAN	K00128
Leukocyte transendothelial migration	1	ko04670	tr|J3KNW4|J3KNW4_HUMAN	K05760
Chemokine signaling pathway	1	ko04062	tr|J3KNW4|J3KNW4_HUMAN	K05760
Shigellosis	1	ko05131	tr|Q53HG7|Q53HG7_HUMAN	K06106
NOD-like receptor signaling pathway	1	ko04621	sp|Q93052|LPP_HUMAN	K12792
Ascorbate and aldarate metabolism	1	ko00053	tr|Q53FB6|Q53FB6_HUMAN	K00128
VEGF signaling pathway	1	ko04370	tr|J3KNW4|J3KNW4_HUMAN	K05760
Metabolism of xenobiotics by cytochrome P450	1	ko00980	tr|Q6FGJ9|Q6FGJ9_HUMAN	K00799
Vasopressin-regulated water reabsorption	1	ko04962	tr|J3QQX2|J3QQX2_HUMAN	K12462
Aminobenzoate degradation	1	ko00627	tr|Q59EH3|Q59EH3_HUMAN	K01078
DNA replication	1	ko03030	tr|Q6FHX6|Q6FHX6_HUMAN	K04799
Dilated cardiomyopathy	1	ko05414	sp|P06753|TPM3_HUMAN	K09290+K10373
Meiosis - yeast	1	ko04113	sp|Q14683|SMC1A_HUMAN	K06636
D-Glutamine and D-glutamate metabolism	1	ko00471	tr|E9KL48|E9KL48_HUMAN	K00261
Biosynthesis of ansamycins	1	ko01051	tr|V9HWD9|V9HWD9_HUMAN	K00615
Non-homologous end-joining	1	ko03450	tr|Q6FHX6|Q6FHX6_HUMAN	K04799
Glycerolipid metabolism	1	ko00561	tr|Q53FB6|Q53FB6_HUMAN	K00128
Focal adhesion	1	ko04510	tr|J3KNW4|J3KNW4_HUMAN	K05760
Phosphatidylinositol signaling system	1	ko04070	tr|H0Y7A7|H0Y7A7_HUMAN	K02183
Pyrimidine metabolism	1	ko00240	tr|Q32Q12|Q32Q12_HUMAN	K00940
Vibrio cholerae infection	1	ko05110	tr|B7Z954|B7Z954_HUMAN	K06098
Cardiac muscle contraction	1	ko04260	sp|P06753|TPM3_HUMAN	K09290+K10373
Phototransduction	1	ko04744	tr|H0Y7A7|H0Y7A7_HUMAN	K02183
Riboflavin metabolism	1	ko00740	tr|Q59EH3|Q59EH3_HUMAN	K01078
Phototransduction - fly	1	ko04745	tr|H0Y7A7|H0Y7A7_HUMAN	K02183
Long-term potentiation	1	ko04720	tr|H0Y7A7|H0Y7A7_HUMAN	K02183
Proximal tubule bicarbonate reclamation	1	ko04964	tr|E9KL48|E9KL48_HUMAN	K00261
Plant-pathogen interaction	1	ko04626	tr|H0Y7A7|H0Y7A7_HUMAN	K02183
Cell cycle	1	ko04110	sp|Q14683|SMC1A_HUMAN	K06636
Lysosome	1	ko04142	tr|A0A024RAJ6|A0A024RAJ6_HUMAN	K12373
Gastric acid secretion	1	ko04971	tr|H0Y7A7|H0Y7A7_HUMAN	K02183
beta-Alanine metabolism	1	ko00410	tr|Q53FB6|Q53FB6_HUMAN	K00128
Glioma	1	ko05214	tr|H0Y7A7|H0Y7A7_HUMAN	K02183
Hypertrophic cardiomyopathy (HCM)	1	ko05410	sp|P06753|TPM3_HUMAN	K09290+K10373
Olfactory transduction	1	ko04740	tr|H0Y7A7|H0Y7A7_HUMAN	K02183
Glycosphingolipid biosynthesis - globo series	1	ko00603	tr|A0A024RAJ6|A0A024RAJ6_HUMAN	K12373
Pentose and glucuronate interconversions	1	ko00040	tr|Q53FB6|Q53FB6_HUMAN	K00128
Thyroid cancer	1	ko05216	sp|P06753|TPM3_HUMAN	K09290
Drug metabolism - cytochrome P450	1	ko00982	tr|Q6FGJ9|Q6FGJ9_HUMAN	K00799

## Sheet: HHvsC
Up-regulated
#Pathway	Count (174)	Pathway ID	Proteins	KOs
Metabolic pathways	29	ko01100	sp|O00116|ADAS_HUMAN;sp|P04843|RPN1_HUMAN;sp|P36542|ATPG_HUMAN;sp|P51659|DHB4_HUMAN;sp|P54886|P5CS_HUMAN;sp|P55084|ECHB_HUMAN;sp|Q02218|ODO1_HUMAN;sp|Q6P996|PDXD1_HUMAN;sp|Q99714|HCD2_HUMAN;tr|A0A024QZ30|A0A024QZ30_HUMAN;tr|A0A024R5C5|A0A024R5C5_HUMAN;tr|A0A024R6W0|A0A024R6W0_HUMAN;tr|A0A024R8N6|A0A024R8N6_HUMAN;tr|A0A024RAG0|A0A024RAG0_HUMAN;tr|A0A024RBX9|A0A024RBX9_HUMAN;tr|A0A087WVM4|A0A087WVM…	K00803+K12666+K02136+K12405+K12657+K07509+K00164+K01580+K01590+K08683+K00234+K01958+K00813+K00857+K01077+K00161+K13402+K07508+K01681+K00923+K03008+K12348+K00758+K07515+K00261+K00026+K00600+K02132+K02133+K05546
Protein processing in endoplasmic reticulum	20	ko04141	sp|P04843|RPN1_HUMAN;sp|P27824|CALX_HUMAN;sp|Q15084|PDIA6_HUMAN;sp|Q8NBS9|TXND5_HUMAN;tr|A0A024R2A7|A0A024R2A7_HUMAN;tr|A0A024R663|A0A024R663_HUMAN;tr|A0A024R8S5|A0A024R8S5_HUMAN;tr|A0A024RBH2|A0A024RBH2_HUMAN;tr|A0A087X054|A0A087X054_HUMAN;tr|A0A090N8Y2|A0A090N8Y2_HUMAN;tr|A0A0A0MRV0|A0A0A0MRV0_HUMAN;tr|A8KA82|A8KA82_HUMAN;tr|A8KAK1|A8KAK1_HUMAN;tr|K7ELL7|K7ELL7_HUMAN;tr|V9HVY3|V9HVY3_HUMAN;tr|V…	K12666+K08054+K09584+K13984+K10080+K14000+K09580+K13999+K09486+K09582+K09523+K11718+K08288+K08056+K09586+K08057+K09490+K05546+K09487
Focal adhesion	14	ko04510	sp|O15230|LAMA5_HUMAN;sp|O43707|ACTN4_HUMAN;sp|P02462|CO4A1_HUMAN;sp|P05556|ITB1_HUMAN;sp|P21333|FLNA_HUMAN;tr|A0A024R0Q5|A0A024R0Q5_HUMAN;tr|A0A024R694|A0A024R694_HUMAN;tr|A0A024R972|A0A024R972_HUMAN;tr|A0A024RB87|A0A024RB87_HUMAN;tr|A5YM53|A5YM53_HUMAN;tr|B2R627|B2R627_HUMAN;tr|B7ZLD8|B7ZLD8_HUMAN;tr|H0Y2Y8|H0Y2Y8_HUMAN;tr|Q53HL1|Q53HL1_HUMAN	K06240+K05699+K06237+K05719+K04437+K06270+K05635+K07836+K06487+K06484+K06525+K06273+K12757
Microbial metabolism in diverse environments	13	ko01120	sp|P46087|NOP2_HUMAN;sp|P55084|ECHB_HUMAN;sp|Q02218|ODO1_HUMAN;tr|A0A024R5C5|A0A024R5C5_HUMAN;tr|A0A024R6W0|A0A024R6W0_HUMAN;tr|A0A024RAG0|A0A024RAG0_HUMAN;tr|A0A024RBX9|A0A024RBX9_HUMAN;tr|B2R7C7|B2R7C7_HUMAN;tr|B2RB23|B2RB23_HUMAN;tr|B2RBW5|B2RBW5_HUMAN;tr|E9KL44|E9KL44_HUMAN;tr|Q6FHZ0|Q6FHZ0_HUMAN;tr|V9HW06|V9HW06_HUMAN	K00599+K07509+K00164+K01958+K00813+K01077+K00161+K07508+K01681+K07515+K00026+K00600
Biosynthesis of secondary metabolites	12	ko01110	sp|P55084|ECHB_HUMAN;sp|Q02218|ODO1_HUMAN;sp|Q6P996|PDXD1_HUMAN;sp|Q99714|HCD2_HUMAN;tr|A0A024QZ30|A0A024QZ30_HUMAN;tr|A0A024R6W0|A0A024R6W0_HUMAN;tr|A0A024RBX9|A0A024RBX9_HUMAN;tr|B2RB23|B2RB23_HUMAN;tr|B2RBW5|B2RBW5_HUMAN;tr|E9KL44|E9KL44_HUMAN;tr|Q6FHZ0|Q6FHZ0_HUMAN;tr|V9HW06|V9HW06_HUMAN	K07509+K00164+K01580+K01590+K08683+K00234+K00813+K00161+K07508+K01681+K07515+K00026+K00600
Pathways in cancer	11	ko05200	sp|O15230|LAMA5_HUMAN;sp|P02462|CO4A1_HUMAN;sp|P05556|ITB1_HUMAN;sp|P11233|RALA_HUMAN;sp|P12270|TPR_HUMAN;sp|Q9P0K7|RAI14_HUMAN;tr|A0A024R972|A0A024R972_HUMAN;tr|A5YM53|A5YM53_HUMAN;tr|B2RDE1|B2RDE1_HUMAN;tr|G4XXL9|G4XXL9_HUMAN;tr|V9HWP2|V9HWP2_HUMAN	K06240+K06237+K05719+K07834+K09291+K08803+K05635+K06487+K09290+K08738+K09487
Spliceosome	9	ko03040	sp|O00567|NOP56_HUMAN;sp|O75400|PR40A_HUMAN;sp|O94906|PRP6_HUMAN;sp|P52272|HNRPM_HUMAN;sp|Q15393|SF3B3_HUMAN;tr|B2R5W2|B2R5W2_HUMAN;tr|B4DLR3|B4DLR3_HUMAN;tr|B4DSH1|B4DSH1_HUMAN;tr|Q6I9S2|Q6I9S2_HUMAN	K12844+K12821+K12855+K12887+K12830+K12884+K12888+K12860+K06063
Phagosome	9	ko04145	sp|P05556|ITB1_HUMAN;sp|P27824|CALX_HUMAN;sp|Q15075|EEA1_HUMAN;tr|A5YM53|A5YM53_HUMAN;tr|B2R627|B2R627_HUMAN;tr|B4DPZ3|B4DPZ3_HUMAN;tr|Q1ELT0|Q1ELT0_HUMAN;tr|Q9MYC0|Q9MYC0_HUMAN;tr|V9HW88|V9HW88_HUMAN	K05719+K08054+K12478+K06487+K06484+K10415+K06751+K08057
Arrhythmogenic right ventricular cardiomyopathy (ARVC)	9	ko05412	sp|O43707|ACTN4_HUMAN;sp|P05556|ITB1_HUMAN;sp|P15924|DESP_HUMAN;sp|Q14126|DSG2_HUMAN;sp|Q9Y446|PKP3_HUMAN;tr|A0A024R694|A0A024R694_HUMAN;tr|A5YM53|A5YM53_HUMAN;tr|B2R627|B2R627_HUMAN;tr|B7ZLD8|B7ZLD8_HUMAN	K05699+K05719+K10381+K07597+K12642+K06487+K06484+K06525
Regulation of actin cytoskeleton	8	ko04810	sp|O43707|ACTN4_HUMAN;sp|P05556|ITB1_HUMAN;tr|A0A024R0Q5|A0A024R0Q5_HUMAN;tr|A0A024R694|A0A024R694_HUMAN;tr|A5YM53|A5YM53_HUMAN;tr|B2R627|B2R627_HUMAN;tr|B7ZLD8|B7ZLD8_HUMAN;tr|Q53HL1|Q53HL1_HUMAN	K05699+K05719+K06270+K06487+K06484+K06525+K12757
Huntington's disease	8	ko05016	sp|O00291|HIP1_HUMAN;sp|P21796|VDAC1_HUMAN;sp|P36542|ATPG_HUMAN;tr|A0A024QZ30|A0A024QZ30_HUMAN;tr|B3KMV5|B3KMV5_HUMAN;tr|G4XXL9|G4XXL9_HUMAN;tr|V9HW26|V9HW26_HUMAN;tr|V9HW31|V9HW31_HUMAN	K04559+K05862+K02136+K00234+K03008+K08738+K02132+K02133
Alzheimer's disease	8	ko05010	sp|P16615|AT2A2_HUMAN;sp|P36542|ATPG_HUMAN;sp|Q14573|ITPR3_HUMAN;sp|Q99714|HCD2_HUMAN;tr|A0A024QZ30|A0A024QZ30_HUMAN;tr|G4XXL9|G4XXL9_HUMAN;tr|V9HW26|V9HW26_HUMAN;tr|V9HW31|V9HW31_HUMAN	K05853+K02136+K04960+K08683+K00234+K08738+K02132+K02133
Parkinson's disease	7	ko05012	sp|O43464|HTRA2_HUMAN;sp|P21796|VDAC1_HUMAN;sp|P36542|ATPG_HUMAN;tr|A0A024QZ30|A0A024QZ30_HUMAN;tr|G4XXL9|G4XXL9_HUMAN;tr|V9HW26|V9HW26_HUMAN;tr|V9HW31|V9HW31_HUMAN	K08669+K05862+K02136+K00234+K08738+K02132+K02133
Dilated cardiomyopathy	7	ko05414	sp|P05556|ITB1_HUMAN;sp|P63092|GNAS2_HUMAN;tr|A5YM53|A5YM53_HUMAN;tr|B2R627|B2R627_HUMAN;tr|B2RDE1|B2RDE1_HUMAN;tr|B7ZLD8|B7ZLD8_HUMAN;tr|D9YZV5|D9YZV5_HUMAN	K05719+K04632+K06487+K06484+K09290+K06525+K10373+K10374
ECM-receptor interaction	7	ko04512	sp|O15230|LAMA5_HUMAN;sp|P02462|CO4A1_HUMAN;sp|P05556|ITB1_HUMAN;tr|A0A024R972|A0A024R972_HUMAN;tr|A5YM53|A5YM53_HUMAN;tr|B2R627|B2R627_HUMAN;tr|B7ZLD8|B7ZLD8_HUMAN	K06240+K06237+K05719+K05635+K06487+K06484+K06525
Amoebiasis	6	ko05146	sp|O15230|LAMA5_HUMAN;sp|O43707|ACTN4_HUMAN;sp|P02462|CO4A1_HUMAN;sp|P63092|GNAS2_HUMAN;tr|A0A024R694|A0A024R694_HUMAN;tr|A0A024R972|A0A024R972_HUMAN	K06240+K05699+K06237+K04632+K05635
Small cell lung cancer	6	ko05222	sp|O15230|LAMA5_HUMAN;sp|P02462|CO4A1_HUMAN;sp|P05556|ITB1_HUMAN;tr|A0A024R972|A0A024R972_HUMAN;tr|A5YM53|A5YM53_HUMAN;tr|G4XXL9|G4XXL9_HUMAN	K06240+K06237+K05719+K05635+K06487+K08738
Citrate cycle (TCA cycle)	6	ko00020	sp|Q02218|ODO1_HUMAN;tr|A0A024QZ30|A0A024QZ30_HUMAN;tr|A0A024R5C5|A0A024R5C5_HUMAN;tr|A0A024RBX9|A0A024RBX9_HUMAN;tr|B2RBW5|B2RBW5_HUMAN;tr|Q6FHZ0|Q6FHZ0_HUMAN	K00164+K00234+K01958+K00161+K01681+K00026
Hypertrophic cardiomyopathy (HCM)	6	ko05410	sp|P05556|ITB1_HUMAN;tr|A5YM53|A5YM53_HUMAN;tr|B2R627|B2R627_HUMAN;tr|B2RDE1|B2RDE1_HUMAN;tr|B7ZLD8|B7ZLD8_HUMAN;tr|D9YZV5|D9YZV5_HUMAN	K05719+K06487+K06484+K09290+K06525+K10373+K10374
Pancreatic secretion	6	ko04972	sp|P05023|AT1A1_HUMAN;sp|P16615|AT2A2_HUMAN;sp|P63092|GNAS2_HUMAN;sp|Q14573|ITPR3_HUMAN;tr|A0A024RB87|A0A024RB87_HUMAN;tr|Q9UEY5|Q9UEY5_HUMAN	K01539+K05853+K04632+K04960+K07836+K13855
Antigen processing and presentation	6	ko04612	sp|P27824|CALX_HUMAN;tr|Q1ELT0|Q1ELT0_HUMAN;tr|Q9MYC0|Q9MYC0_HUMAN;tr|V9HVY3|V9HVY3_HUMAN;tr|V9HW88|V9HW88_HUMAN;tr|V9HWJ8|V9HWJ8_HUMAN	K08054+K06751+K08056+K08057+K06698
Endocytosis	5	ko04144	sp|Q15075|EEA1_HUMAN;tr|A0A024R9N6|A0A024R9N6_HUMAN;tr|E5KLK2|E5KLK2_HUMAN;tr|Q1ELT0|Q1ELT0_HUMAN;tr|Q9MYC0|Q9MYC0_HUMAN	K12478+K12477+K01528+K06751
Leukocyte transendothelial migration	5	ko04670	sp|O43707|ACTN4_HUMAN;sp|P05556|ITB1_HUMAN;tr|A0A024R694|A0A024R694_HUMAN;tr|A0A024RB87|A0A024RB87_HUMAN;tr|Q53HL1|Q53HL1_HUMAN	K05699+K05719+K07836+K12757
Valine, leucine and isoleucine degradation	5	ko00280	sp|P55084|ECHB_HUMAN;sp|Q99714|HCD2_HUMAN;tr|A0A024R040|A0A024R040_HUMAN;tr|B2RB23|B2RB23_HUMAN;tr|E9KL44|E9KL44_HUMAN	K07509+K08683+K01027+K07508+K07515
Cell adhesion molecules (CAMs)	5	ko04514	sp|P05556|ITB1_HUMAN;tr|A5YM53|A5YM53_HUMAN;tr|Q1ELT0|Q1ELT0_HUMAN;tr|Q7Z3Z9|Q7Z3Z9_HUMAN;tr|Q9MYC0|Q9MYC0_HUMAN	K05719+K06487+K06751+K06550
Peroxisome	4	ko04146	sp|O00116|ADAS_HUMAN;sp|O75521|ECI2_HUMAN;sp|P51659|DHB4_HUMAN;sp|Q8WVX9|FACR1_HUMAN	K00803+K13239+K12405+K13356
Systemic lupus erythematosus	4	ko05322	sp|O43707|ACTN4_HUMAN;sp|O75367|H2AY_HUMAN;sp|Q71DI3|H32_HUMAN;tr|A0A024R694|A0A024R694_HUMAN	K05699+K11251+K11253
Calcium signaling pathway	4	ko04020	sp|P16615|AT2A2_HUMAN;sp|P21796|VDAC1_HUMAN;sp|P63092|GNAS2_HUMAN;sp|Q14573|ITPR3_HUMAN	K05853+K05862+K04632+K04960
Vascular smooth muscle contraction	4	ko04270	sp|P63092|GNAS2_HUMAN;sp|Q14573|ITPR3_HUMAN;tr|A0A024R0Q5|A0A024R0Q5_HUMAN;tr|E7EX44|E7EX44_HUMAN	K04632+K04960+K06270+K12329+K12327
Protein digestion and absorption	4	ko04974	sp|P02462|CO4A1_HUMAN;sp|P05023|AT1A1_HUMAN;tr|J3KPF3|J3KPF3_HUMAN;tr|Q71UA6|Q71UA6_HUMAN	K06237+K01539+K06519+K05616
Toxoplasmosis	4	ko05145	sp|O15230|LAMA5_HUMAN;sp|P05556|ITB1_HUMAN;tr|A0A024R972|A0A024R972_HUMAN;tr|G4XXL9|G4XXL9_HUMAN	K06240+K05719+K05635+K08738
Gastric acid secretion	4	ko04971	sp|P05023|AT1A1_HUMAN;sp|P63092|GNAS2_HUMAN;sp|Q14573|ITPR3_HUMAN;tr|Q9UEY5|Q9UEY5_HUMAN	K01539+K04632+K04960+K13855
Viral myocarditis	4	ko05416	tr|A0A024R1N1|A0A024R1N1_HUMAN;tr|G4XXL9|G4XXL9_HUMAN;tr|Q1ELT0|Q1ELT0_HUMAN;tr|Q9MYC0|Q9MYC0_HUMAN	K10352+K08738+K06751
Salivary secretion	4	ko04970	sp|P05023|AT1A1_HUMAN;sp|P63092|GNAS2_HUMAN;sp|Q14573|ITPR3_HUMAN;tr|Q9UEY5|Q9UEY5_HUMAN	K01539+K04632+K04960+K13855
Oxidative phosphorylation	4	ko00190	sp|P36542|ATPG_HUMAN;tr|A0A024QZ30|A0A024QZ30_HUMAN;tr|V9HW26|V9HW26_HUMAN;tr|V9HW31|V9HW31_HUMAN	K02136+K00234+K02132+K02133
Fatty acid metabolism	4	ko00071	sp|O75521|ECI2_HUMAN;sp|P55084|ECHB_HUMAN;tr|B2RB23|B2RB23_HUMAN;tr|E9KL44|E9KL44_HUMAN	K13239+K07509+K07508+K07515
Butanoate metabolism	4	ko00650	sp|Q6P996|PDXD1_HUMAN;tr|A0A024R040|A0A024R040_HUMAN;tr|A0A024RBX9|A0A024RBX9_HUMAN;tr|E9KL44|E9KL44_HUMAN	K01580+K01027+K00161+K07515
Type I diabetes mellitus	4	ko04940	sp|Q6P996|PDXD1_HUMAN;tr|A0A024R3X4|A0A024R3X4_HUMAN;tr|Q1ELT0|Q1ELT0_HUMAN;tr|Q9MYC0|Q9MYC0_HUMAN	K01580+K04077+K06751
Pyrimidine metabolism	4	ko00240	sp|Q8TCS8|PNPT1_HUMAN;tr|A0A024R8N6|A0A024R8N6_HUMAN;tr|B3KMV5|B3KMV5_HUMAN;tr|E5KRG5|E5KRG5_HUMAN	K00962+K00857+K03008+K00758
Tight junction	4	ko04530	sp|O43707|ACTN4_HUMAN;tr|A0A024R1N1|A0A024R1N1_HUMAN;tr|A0A024R694|A0A024R694_HUMAN;tr|Q53HL1|Q53HL1_HUMAN	K05699+K10352+K12757
RNA degradation	4	ko03018	sp|P38646|GRP75_HUMAN;sp|Q8TCS8|PNPT1_HUMAN;tr|A0A024R3X4|A0A024R3X4_HUMAN;tr|Q5TDG3|Q5TDG3_HUMAN	K04043+K00962+K04077+K12602
Adherens junction	4	ko04520	sp|O43707|ACTN4_HUMAN;tr|A0A024R694|A0A024R694_HUMAN;tr|A8K3M3|A8K3M3_HUMAN;tr|E9PMS6|E9PMS6_HUMAN	K05699+K05696+K06084
Bacterial invasion of epithelial cells	3	ko05100	sp|P05556|ITB1_HUMAN;tr|B2R627|B2R627_HUMAN;tr|E5KLK2|E5KLK2_HUMAN	K05719+K06484+K01528
Bile secretion	3	ko04976	sp|P05023|AT1A1_HUMAN;sp|P63092|GNAS2_HUMAN;tr|Q9UEY5|Q9UEY5_HUMAN	K01539+K04632+K13855
Aminobenzoate degradation	3	ko00627	tr|A0A024RAG0|A0A024RAG0_HUMAN;tr|B2R7C7|B2R7C7_HUMAN;tr|E9KL44|E9KL44_HUMAN	K01077+K07515
Ribosome	3	ko03010	sp|P46779|RL28_HUMAN;sp|P61254|RL26_HUMAN;sp|P62917|RL8_HUMAN	K02903+K02898+K02938
Cardiac muscle contraction	3	ko04260	sp|P05023|AT1A1_HUMAN;tr|B2RDE1|B2RDE1_HUMAN;tr|D9YZV5|D9YZV5_HUMAN	K01539+K09290+K10373+K10374
Pyruvate metabolism	3	ko00620	tr|A0A024R5C5|A0A024R5C5_HUMAN;tr|A0A024RBX9|A0A024RBX9_HUMAN;tr|Q6FHZ0|Q6FHZ0_HUMAN	K01958+K00161+K00026
Benzoate degradation	3	ko00362	sp|P55084|ECHB_HUMAN;tr|B2RB23|B2RB23_HUMAN;tr|E9KL44|E9KL44_HUMAN	K07509+K07508+K07515
Glyoxylate and dicarboxylate metabolism	3	ko00630	tr|A0A087WVM4|A0A087WVM4_HUMAN;tr|B2RBW5|B2RBW5_HUMAN;tr|Q6FHZ0|Q6FHZ0_HUMAN	K13402+K01681+K00026
Lysine degradation	3	ko00310	sp|Q02218|ODO1_HUMAN;sp|Q8NBJ5|GT251_HUMAN;tr|E9KL44|E9KL44_HUMAN	K00164+K11703+K07515
Fatty acid elongation in mitochondria	3	ko00062	sp|P55084|ECHB_HUMAN;tr|B2RB23|B2RB23_HUMAN;tr|E9KL44|E9KL44_HUMAN	K07509+K07508+K07515
Alanine, aspartate and glutamate metabolism	3	ko00250	sp|Q6P996|PDXD1_HUMAN;tr|A0A024R6W0|A0A024R6W0_HUMAN;tr|E9KL48|E9KL48_HUMAN	K01580+K00813+K00261
Arginine and proline metabolism	3	ko00330	sp|P54886|P5CS_HUMAN;tr|A0A024R6W0|A0A024R6W0_HUMAN;tr|E9KL48|E9KL48_HUMAN	K12657+K00813+K00261
Proteasome	3	ko03050	sp|P35998|PRS7_HUMAN;tr|Q5U0A0|Q5U0A0_HUMAN;tr|V9HWJ8|V9HWJ8_HUMAN	K03061+K02729+K06698
Long-term potentiation	3	ko04720	sp|Q14573|ITPR3_HUMAN;tr|A0A024R0Q5|A0A024R0Q5_HUMAN;tr|A0A024RB87|A0A024RB87_HUMAN	K04960+K06270+K07836
Purine metabolism	2	ko00230	sp|Q8TCS8|PNPT1_HUMAN;tr|B3KMV5|B3KMV5_HUMAN	K00962+K03008
Gap junction	2	ko04540	sp|P63092|GNAS2_HUMAN;sp|Q14573|ITPR3_HUMAN	K04632+K04960
Drug metabolism - other enzymes	2	ko00983	tr|A0A024R8N6|A0A024R8N6_HUMAN;tr|E5KRG5|E5KRG5_HUMAN	K00857+K00758
PPAR signaling pathway	2	ko03320	sp|O60664|PLIN3_HUMAN;tr|Q6FHZ7|Q6FHZ7_HUMAN	K08768
Axon guidance	2	ko04360	sp|P05556|ITB1_HUMAN;tr|Q7Z3Z9|Q7Z3Z9_HUMAN	K05719+K06550
N-Glycan biosynthesis	2	ko00510	sp|P04843|RPN1_HUMAN;tr|V9HWJ0|V9HWJ0_HUMAN	K12666+K05546
Chagas disease	2	ko05142	sp|P63092|GNAS2_HUMAN;tr|V9HW88|V9HW88_HUMAN	K04632+K08057
Histidine metabolism	2	ko00340	sp|P46087|NOP2_HUMAN;sp|Q6P996|PDXD1_HUMAN	K00599+K01590
Tryptophan metabolism	2	ko00380	sp|Q02218|ODO1_HUMAN;tr|E9KL44|E9KL44_HUMAN	K00164+K07515
Phosphatidylinositol signaling system	2	ko04070	sp|Q14573|ITPR3_HUMAN;tr|B3KMV5|B3KMV5_HUMAN	K04960+K00923
Vibrio cholerae infection	2	ko05110	sp|P63092|GNAS2_HUMAN;tr|A0A090N8Y2|A0A090N8Y2_HUMAN	K04632+K09582
Plant-pathogen interaction	2	ko04626	sp|P49411|EFTU_HUMAN;tr|V9HWP2|V9HWP2_HUMAN	K02358+K09487
beta-Alanine metabolism	2	ko00410	sp|Q6P996|PDXD1_HUMAN;tr|E9KL44|E9KL44_HUMAN	K01580+K07515
Two-component system	2	ko02020	tr|A0A024RAG0|A0A024RAG0_HUMAN;tr|B2R7C7|B2R7C7_HUMAN	K01077
Autoimmune thyroid disease	2	ko05320	tr|Q1ELT0|Q1ELT0_HUMAN;tr|Q9MYC0|Q9MYC0_HUMAN	K06751
Thyroid cancer	2	ko05216	sp|P12270|TPR_HUMAN;tr|B2RDE1|B2RDE1_HUMAN	K09291+K09290
Allograft rejection	2	ko05330	tr|Q1ELT0|Q1ELT0_HUMAN;tr|Q9MYC0|Q9MYC0_HUMAN	K06751
Tyrosine metabolism	2	ko00350	sp|P46087|NOP2_HUMAN;tr|A0A024R6W0|A0A024R6W0_HUMAN	K00599+K00813
Homologous recombination	2	ko03440	tr|F8W7U8|F8W7U8_HUMAN;tr|Q567R6|Q567R6_HUMAN	K10865+K03111
GnRH signaling pathway	2	ko04912	sp|P63092|GNAS2_HUMAN;sp|Q14573|ITPR3_HUMAN	K04632+K04960
MAPK signaling pathway	2	ko04010	sp|P21333|FLNA_HUMAN;tr|A0A024RB87|A0A024RB87_HUMAN	K04437+K07836
Folate biosynthesis	2	ko00790	tr|A0A024RAG0|A0A024RAG0_HUMAN;tr|B2R7C7|B2R7C7_HUMAN	K01077
Shigellosis	2	ko05131	sp|P05556|ITB1_HUMAN;tr|B2R627|B2R627_HUMAN	K05719+K06484
Graft-versus-host disease	2	ko05332	tr|Q1ELT0|Q1ELT0_HUMAN;tr|Q9MYC0|Q9MYC0_HUMAN	K06751
Bladder cancer	2	ko05219	sp|Q9P0K7|RAI14_HUMAN;tr|E5KRG5|E5KRG5_HUMAN	K08803+K00758
Vasopressin-regulated water reabsorption	2	ko04962	sp|P63092|GNAS2_HUMAN;tr|B4DPZ3|B4DPZ3_HUMAN	K04632+K10415
Long-term depression	2	ko04730	sp|P63092|GNAS2_HUMAN;sp|Q14573|ITPR3_HUMAN	K04632+K04960
Prion diseases	2	ko05020	tr|A0A024R972|A0A024R972_HUMAN;tr|V9HWB4|V9HWB4_HUMAN	K05635+K09490
Proximal tubule bicarbonate reclamation	2	ko04964	sp|P05023|AT1A1_HUMAN;tr|E9KL48|E9KL48_HUMAN	K01539+K00261
One carbon pool by folate	2	ko00670	tr|A0A087WVM4|A0A087WVM4_HUMAN;tr|V9HW06|V9HW06_HUMAN	K13402+K00600
Carbon fixation in photosynthetic organisms	2	ko00710	tr|A0A024R6W0|A0A024R6W0_HUMAN;tr|Q6FHZ0|Q6FHZ0_HUMAN	K00813+K00026
Taste transduction	2	ko04742	sp|P63092|GNAS2_HUMAN;sp|Q14573|ITPR3_HUMAN	K04632+K04960
Hepatitis C	1	ko05160	tr|V9HWJ8|V9HWJ8_HUMAN	K06698
Renal cell carcinoma	1	ko05211	tr|A0A024RB87|A0A024RB87_HUMAN	K07836
Polycyclic aromatic hydrocarbon degradation	1	ko00624	sp|P46087|NOP2_HUMAN	K00599
Porphyrin and chlorophyll metabolism	1	ko00860	tr|Q6NS36|Q6NS36_HUMAN	K00522
Selenoamino acid metabolism	1	ko00450	sp|P46087|NOP2_HUMAN	K00599
Methane metabolism	1	ko00680	tr|V9HW06|V9HW06_HUMAN	K00600
Protein export	1	ko03060	tr|V9HWB4|V9HWB4_HUMAN	K09490
Melanogenesis	1	ko04916	sp|P63092|GNAS2_HUMAN	K04632
Taurine and hypotaurine metabolism	1	ko00430	sp|Q6P996|PDXD1_HUMAN	K01580
Cysteine and methionine metabolism	1	ko00270	tr|A0A024R6W0|A0A024R6W0_HUMAN	K00813
Primary bile acid biosynthesis	1	ko00120	sp|P51659|DHB4_HUMAN	K12405
Biosynthesis of unsaturated fatty acids	1	ko01040	tr|E9KL44|E9KL44_HUMAN	K07515
Chemokine signaling pathway	1	ko04062	tr|A0A024RB87|A0A024RB87_HUMAN	K07836
NOD-like receptor signaling pathway	1	ko04621	tr|V9HWP2|V9HWP2_HUMAN	K09487
Caprolactam degradation	1	ko00930	tr|E9KL44|E9KL44_HUMAN	K07515
Leishmaniasis	1	ko05140	sp|P05556|ITB1_HUMAN	K05719
Sphingolipid metabolism	1	ko00600	tr|D3DSQ1|D3DSQ1_HUMAN	K12348
Propanoate metabolism	1	ko00640	tr|E9KL44|E9KL44_HUMAN	K07515
Isoquinoline alkaloid biosynthesis	1	ko00950	tr|A0A024R6W0|A0A024R6W0_HUMAN	K00813
Glutathione metabolism	1	ko00480	tr|A0A087X1J7|A0A087X1J7_HUMAN	K00432
D-Glutamine and D-glutamate metabolism	1	ko00471	tr|E9KL48|E9KL48_HUMAN	K00261
p53 signaling pathway	1	ko04115	tr|G4XXL9|G4XXL9_HUMAN	K08738
Glycine, serine and threonine metabolism	1	ko00260	tr|V9HW06|V9HW06_HUMAN	K00600
Aldosterone-regulated sodium reabsorption	1	ko04960	sp|P05023|AT1A1_HUMAN	K01539
Fc gamma R-mediated phagocytosis	1	ko04666	tr|E5KLK2|E5KLK2_HUMAN	K01528
Prostate cancer	1	ko05215	tr|V9HWP2|V9HWP2_HUMAN	K09487
Mismatch repair	1	ko03430	tr|Q567R6|Q567R6_HUMAN	K03111
Insulin signaling pathway	1	ko04910	tr|A8K3M3|A8K3M3_HUMAN	K05696
Tropane, piperidine and pyridine alkaloid biosynthesis	1	ko00960	tr|A0A024R6W0|A0A024R6W0_HUMAN	K00813
Colorectal cancer	1	ko05210	tr|G4XXL9|G4XXL9_HUMAN	K08738
Neurotrophin signaling pathway	1	ko04722	tr|A0A024RB87|A0A024RB87_HUMAN	K07836
Inositol phosphate metabolism	1	ko00562	tr|B3KMV5|B3KMV5_HUMAN	K00923
RNA transport	1	ko03013	sp|P12270|TPR_HUMAN	K09291
Carbohydrate digestion and absorption	1	ko04973	sp|P05023|AT1A1_HUMAN	K01539
Hematopoietic cell lineage	1	ko04640	tr|B2R627|B2R627_HUMAN	K06484
MAPK signaling pathway - yeast	1	ko04011	sp|P12270|TPR_HUMAN	K09291
Glycolysis / Gluconeogenesis	1	ko00010	tr|A0A024RBX9|A0A024RBX9_HUMAN	K00161
Ether lipid metabolism	1	ko00565	sp|O00116|ADAS_HUMAN	K00803
Arachidonic acid metabolism	1	ko00590	tr|A0A087X1J7|A0A087X1J7_HUMAN	K00432
Wnt signaling pathway	1	ko04310	tr|A4D0U5|A4D0U5_HUMAN	K04511
Phenylalanine, tyrosine and tryptophan biosynthesis	1	ko00400	tr|A0A024R6W0|A0A024R6W0_HUMAN	K00813
Nitrogen metabolism	1	ko00910	tr|E9KL48|E9KL48_HUMAN	K00261
Notch signaling pathway	1	ko04330	tr|Q6I9S2|Q6I9S2_HUMAN	K06063
DNA replication	1	ko03030	tr|Q567R6|Q567R6_HUMAN	K03111
Other types of O-glycan biosynthesis	1	ko00514	sp|Q8NBJ5|GT251_HUMAN	K11703
Phenylalanine metabolism	1	ko00360	tr|A0A024R6W0|A0A024R6W0_HUMAN	K00813
Non-homologous end-joining	1	ko03450	tr|F8W7U8|F8W7U8_HUMAN	K10865
Apoptosis	1	ko04210	tr|G4XXL9|G4XXL9_HUMAN	K08738
Synthesis and degradation of ketone bodies	1	ko00072	tr|A0A024R040|A0A024R040_HUMAN	K01027
Oocyte meiosis	1	ko04114	sp|Q14573|ITPR3_HUMAN	K04960
RNA polymerase	1	ko03020	tr|B3KMV5|B3KMV5_HUMAN	K03008
Reductive carboxylate cycle (CO2 fixation)	1	ko00720	tr|B2RBW5|B2RBW5_HUMAN	K01681
Amyotrophic lateral sclerosis (ALS)	1	ko05014	tr|G4XXL9|G4XXL9_HUMAN	K08738
Pathogenic Escherichia coli infection	1	ko05130	sp|P05556|ITB1_HUMAN	K05719
Cyanoamino acid metabolism	1	ko00460	tr|V9HW06|V9HW06_HUMAN	K00600
Lysosome	1	ko04142	tr|D3DSQ1|D3DSQ1_HUMAN	K12348
Valine, leucine and isoleucine biosynthesis	1	ko00290	tr|A0A024RBX9|A0A024RBX9_HUMAN	K00161
Novobiocin biosynthesis	1	ko00401	tr|A0A024R6W0|A0A024R6W0_HUMAN	K00813
Pancreatic cancer	1	ko05212	sp|P11233|RALA_HUMAN	K07834
Ubiquitin mediated proteolysis	1	ko04120	sp|Q14139|UBE4A_HUMAN	K10596
Down-regulated
#Pathway	Count (148)	Pathway ID	Proteins	KOs
Metabolic pathways	38	ko01100	sp|O43175|SERA_HUMAN;sp|P14324|FPPS_HUMAN;sp|P17174|AATC_HUMAN;sp|P32929|CGL_HUMAN;sp|P36871|PGM1_HUMAN;sp|P37837|TALDO_HUMAN;sp|P49327|FAS_HUMAN;sp|P52209|6PGD_HUMAN;sp|P60174|TPIS_HUMAN;sp|Q16850|CP51A_HUMAN;sp|Q6YN16|HSDL2_HUMAN;sp|Q9BWD1|THIC_HUMAN;tr|A0A024R1T9|A0A024R1T9_HUMAN;tr|A0A024R4F1|A0A024R4F1_HUMAN;tr|A0A024R7A8|A0A024R7A8_HUMAN;tr|A0A024R9B7|A0A024R9B7_HUMAN;tr|A0A0A0MTS2|A0A0A0MT…	K00058+K00787+K00813+K01758+K01835+K00616+K00665+K00033+K01803+K05917+K08764+K00626+K01648+K01689+K00011+K02268+K01810+K00036+K01915+K01840+K00831+K01062+K00940+K11787+K01940+K00939+K00016+K00760+K01834+K01641+K00873+K11188+K00615+K00025+K00927+K00933+K01623
Biosynthesis of secondary metabolites	28	ko01110	sp|P14324|FPPS_HUMAN;sp|P17174|AATC_HUMAN;sp|P36871|PGM1_HUMAN;sp|P37837|TALDO_HUMAN;sp|P52209|6PGD_HUMAN;sp|P60174|TPIS_HUMAN;sp|Q16850|CP51A_HUMAN;sp|Q9BWD1|THIC_HUMAN;tr|A0A024R1T9|A0A024R1T9_HUMAN;tr|A0A024R4F1|A0A024R4F1_HUMAN;tr|A0A0A0MTS2|A0A0A0MTS2_HUMAN;tr|A8K8D9|A8K8D9_HUMAN;tr|B2R6D4|B2R6D4_HUMAN;tr|Q32Q12|Q32Q12_HUMAN;tr|Q59HH3|Q59HH3_HUMAN;tr|Q5T6L4|Q5T6L4_HUMAN;tr|Q5T9B7|Q5T9B7_HUMA…	K00787+K00813+K01835+K00616+K00033+K01803+K05917+K00626+K01648+K01689+K01810+K00036+K01840+K00940+K11787+K01940+K00939+K00016+K00760+K01834+K01641+K00873+K11188+K00615+K00025+K00927+K01623
Microbial metabolism in diverse environments	22	ko01120	sp|O43175|SERA_HUMAN;sp|P17174|AATC_HUMAN;sp|P36871|PGM1_HUMAN;sp|P37837|TALDO_HUMAN;sp|P52209|6PGD_HUMAN;sp|P60174|TPIS_HUMAN;sp|Q9BWD1|THIC_HUMAN;tr|A0A024R1T9|A0A024R1T9_HUMAN;tr|A0A024R4F1|A0A024R4F1_HUMAN;tr|A0A0A0MTS2|A0A0A0MTS2_HUMAN;tr|A8K8D9|A8K8D9_HUMAN;tr|A8YXX4|A8YXX4_HUMAN;tr|B4DHQ3|B4DHQ3_HUMAN;tr|Q5U077|Q5U077_HUMAN;tr|Q6P6D7|Q6P6D7_HUMAN;tr|V9HWB8|V9HWB8_HUMAN;tr|V9HWB9|V9HWB9_HUM…	K00058+K00813+K01835+K00616+K00033+K01803+K00626+K01648+K01689+K01810+K00036+K01915+K00831+K00016+K01834+K00873+K11188+K00615+K00025+K00927+K01623
Ribosome	15	ko03010	sp|P15880|RS2_HUMAN;sp|P25398|RS12_HUMAN;sp|P27635|RL10_HUMAN;sp|P39023|RL3_HUMAN;sp|P42677|RS27_HUMAN;sp|P62280|RS11_HUMAN;sp|Q02543|RL18A_HUMAN;tr|A0A024R2Q4|A0A024R2Q4_HUMAN;tr|A0A024R4M0|A0A024R4M0_HUMAN;tr|A0A024R814|A0A024R814_HUMAN;tr|A0A024RBS2|A0A024RBS2_HUMAN;tr|B2R491|B2R491_HUMAN;tr|M0R0F0|M0R0F0_HUMAN;tr|Q59GY2|Q59GY2_HUMAN;tr|Q5QTS3|Q5QTS3_HUMAN	K02981+K02951+K02866+K02925+K02978+K02949+K02882+K02877+K02997+K02937+K02941+K02987+K02989+K02930+K02872
Glycolysis / Gluconeogenesis	10	ko00010	sp|P36871|PGM1_HUMAN;sp|P60174|TPIS_HUMAN;tr|A0A024R4F1|A0A024R4F1_HUMAN;tr|A0A0A0MTS2|A0A0A0MTS2_HUMAN;tr|Q5U077|Q5U077_HUMAN;tr|Q6P6D7|Q6P6D7_HUMAN;tr|V9HWB8|V9HWB8_HUMAN;tr|V9HWB9|V9HWB9_HUMAN;tr|V9HWF4|V9HWF4_HUMAN;tr|V9HWN7|V9HWN7_HUMAN	K01835+K01803+K01689+K01810+K00016+K01834+K00873+K00927+K01623
Pentose phosphate pathway	7	ko00030	sp|P36871|PGM1_HUMAN;sp|P37837|TALDO_HUMAN;sp|P52209|6PGD_HUMAN;tr|A0A0A0MTS2|A0A0A0MTS2_HUMAN;tr|A8K8D9|A8K8D9_HUMAN;tr|V9HWD9|V9HWD9_HUMAN;tr|V9HWN7|V9HWN7_HUMAN	K01835+K00616+K00033+K01810+K00036+K00615+K01623
Aminoacyl-tRNA biosynthesis	7	ko00970	sp|P26639|SYTC_HUMAN;sp|P49588|SYAC_HUMAN;sp|P54577|SYYC_HUMAN;tr|A0A024R6K8|A0A024R6K8_HUMAN;tr|A0A024RCN6|A0A024RCN6_HUMAN;tr|B2RBS8|B2RBS8_HUMAN;tr|Q5T5C7|Q5T5C7_HUMAN	K01868+K01872+K01866+K01867+K01873+K01883+K01875
Carbon fixation in photosynthetic organisms	7	ko00710	sp|P17174|AATC_HUMAN;sp|P60174|TPIS_HUMAN;tr|V9HWB8|V9HWB8_HUMAN;tr|V9HWD9|V9HWD9_HUMAN;tr|V9HWF2|V9HWF2_HUMAN;tr|V9HWF4|V9HWF4_HUMAN;tr|V9HWN7|V9HWN7_HUMAN	K00813+K01803+K00873+K00615+K00025+K00927+K01623
Purine metabolism	6	ko00230	sp|P36871|PGM1_HUMAN;tr|Q32Q12|Q32Q12_HUMAN;tr|Q59HH3|Q59HH3_HUMAN;tr|Q5T9B7|Q5T9B7_HUMAN;tr|Q6LET3|Q6LET3_HUMAN;tr|V9HWB8|V9HWB8_HUMAN	K01835+K00940+K11787+K00939+K00760+K00873
Pyruvate metabolism	6	ko00620	sp|Q9BWD1|THIC_HUMAN;tr|A0A024R7A8|A0A024R7A8_HUMAN;tr|Q5U077|Q5U077_HUMAN;tr|V9HWB8|V9HWB8_HUMAN;tr|V9HWB9|V9HWB9_HUMAN;tr|V9HWF2|V9HWF2_HUMAN	K00626+K00011+K00016+K00873+K00025
RNA transport	6	ko03013	sp|P43487|RANG_HUMAN;sp|P78344|IF4G2_HUMAN;tr|A8KA19|A8KA19_HUMAN;tr|B5MDF5|B5MDF5_HUMAN;tr|Q53HQ7|Q53HQ7_HUMAN;tr|Q5U0F4|Q5U0F4_HUMAN	K12172+K03260+K14288+K07936+K03231+K03246
Progesterone-mediated oocyte maturation	6	ko04914	sp|P51812|KS6A3_HUMAN;sp|Q9H9B4|SFXN1_HUMAN;tr|A0A024R7J0|A0A024R7J0_HUMAN;tr|A0A024RD80|A0A024RD80_HUMAN;tr|A0A0A0MS41|A0A0A0MS41_HUMAN;tr|K9JA46|K9JA46_HUMAN	K04373+K03351+K04345+K04079
Oocyte meiosis	6	ko04114	sp|P27348|1433T_HUMAN;sp|P51812|KS6A3_HUMAN;sp|Q9H9B4|SFXN1_HUMAN;tr|A0A024R7J0|A0A024R7J0_HUMAN;tr|A0A0A0MS41|A0A0A0MS41_HUMAN;tr|H0Y7A7|H0Y7A7_HUMAN	K06630+K04373+K03351+K04345+K02183
Cell cycle	6	ko04110	sp|P12004|PCNA_HUMAN;sp|P27348|1433T_HUMAN;sp|P31947|1433S_HUMAN;sp|P49736|MCM2_HUMAN;sp|Q9H9B4|SFXN1_HUMAN;tr|A0A0A0MS41|A0A0A0MS41_HUMAN	K04802+K06630+K06644+K02540+K03351
Endocytosis	5	ko04144	sp|P02786|TFR1_HUMAN;sp|P50570|DYN2_HUMAN;sp|P51149|RAB7A_HUMAN;tr|A0A024R5H1|A0A024R5H1_HUMAN;tr|E9PFW3|E9PFW3_HUMAN	K06503+K01528+K07897+K13649+K11826
Methane metabolism	5	ko00680	sp|O43175|SERA_HUMAN;tr|A0A024R4F1|A0A024R4F1_HUMAN;tr|B4DHQ3|B4DHQ3_HUMAN;tr|Q6P6D7|Q6P6D7_HUMAN;tr|V9HWC7|V9HWC7_HUMAN	K00058+K01689+K00831+K01834+K11188
Protein processing in endoplasmic reticulum	5	ko04141	tr|A0A024R6S1|A0A024R6S1_HUMAN;tr|A0A024RD80|A0A024RD80_HUMAN;tr|B2R6U8|B2R6U8_HUMAN;tr|K9JA46|K9JA46_HUMAN;tr|Q6FI51|Q6FI51_HUMAN	K09503+K04079+K10636+K09507
Amoebiasis	5	ko05146	sp|P51149|RAB7A_HUMAN;tr|A0A024QZN4|A0A024QZN4_HUMAN;tr|A0A024R7J0|A0A024R7J0_HUMAN;tr|A0A087X1N8|A0A087X1N8_HUMAN;tr|V9HWH1|V9HWH1_HUMAN	K07897+K05700+K04345+K13963
Base excision repair	5	ko03410	sp|P12004|PCNA_HUMAN;tr|A0A024RDR0|A0A024RDR0_HUMAN;tr|A8K6N3|A8K6N3_HUMAN;tr|Q5TZP7|Q5TZP7_HUMAN;tr|Q6FHX6|Q6FHX6_HUMAN	K04802+K10802+K10798+K10771+K04799
Fructose and mannose metabolism	5	ko00051	sp|O60825|F262_HUMAN;sp|P60174|TPIS_HUMAN;tr|A0A024R7A8|A0A024R7A8_HUMAN;tr|B2R6D4|B2R6D4_HUMAN;tr|V9HWN7|V9HWN7_HUMAN	K00900+K01103+K01803+K00011+K01840+K01623
Cysteine and methionine metabolism	4	ko00270	sp|P17174|AATC_HUMAN;sp|P32929|CGL_HUMAN;tr|Q5U077|Q5U077_HUMAN;tr|V9HWB9|V9HWB9_HUMAN	K00813+K01758+K00016
Spliceosome	4	ko03040	sp|Q13435|SF3B2_HUMAN;tr|A0A024QZD5|A0A024QZD5_HUMAN;tr|A0A024R1K8|A0A024R1K8_HUMAN;tr|Q53G61|Q53G61_HUMAN	K12829+K11093+K12825+K11092
Neurotrophin signaling pathway	4	ko04722	sp|P27348|1433T_HUMAN;sp|P51812|KS6A3_HUMAN;tr|H0Y7A7|H0Y7A7_HUMAN;tr|J3QQX2|J3QQX2_HUMAN	K06630+K04373+K02183+K12462
Arginine and proline metabolism	4	ko00330	sp|P17174|AATC_HUMAN;tr|A8YXX4|A8YXX4_HUMAN;tr|Q5T6L4|Q5T6L4_HUMAN;tr|V9HWH2|V9HWH2_HUMAN	K00813+K01915+K01940+K00933
Meiosis - yeast	4	ko04113	sp|P49736|MCM2_HUMAN;sp|Q9H9B4|SFXN1_HUMAN;tr|A0A024R7J0|A0A024R7J0_HUMAN;tr|A0A0A0MS41|A0A0A0MS41_HUMAN	K02540+K03351+K04345
Antigen processing and presentation	4	ko04612	sp|Q06323|PSME1_HUMAN;tr|A0A024RD80|A0A024RD80_HUMAN;tr|K9JA46|K9JA46_HUMAN;tr|Q86SZ7|Q86SZ7_HUMAN	K06696+K04079+K06697
Amino sugar and nucleotide sugar metabolism	3	ko00520	sp|P36871|PGM1_HUMAN;tr|A0A0A0MTS2|A0A0A0MTS2_HUMAN;tr|B2R6D4|B2R6D4_HUMAN	K01835+K01810+K01840
Cell cycle - yeast	3	ko04111	sp|P49736|MCM2_HUMAN;sp|Q9H9B4|SFXN1_HUMAN;tr|A0A0A0MS41|A0A0A0MS41_HUMAN	K02540+K03351
Regulation of actin cytoskeleton	3	ko04810	tr|A0A024QZN4|A0A024QZN4_HUMAN;tr|A0A024RC65|A0A024RC65_HUMAN;tr|E9PEZ3|E9PEZ3_HUMAN	K05700+K05767+K05740
Propanoate metabolism	3	ko00640	sp|Q9BWD1|THIC_HUMAN;tr|Q5U077|Q5U077_HUMAN;tr|V9HWB9|V9HWB9_HUMAN	K00626+K00016
Glutathione metabolism	3	ko00480	sp|P52209|6PGD_HUMAN;tr|A8K8D9|A8K8D9_HUMAN;tr|Q6FGJ9|Q6FGJ9_HUMAN	K00033+K00036+K00799
Focal adhesion	3	ko04510	tr|A0A024QZN4|A0A024QZN4_HUMAN;tr|A0A024R0V4|A0A024R0V4_HUMAN;tr|E9PEZ3|E9PEZ3_HUMAN	K05700+K06274+K05740
Plant-pathogen interaction	3	ko04626	tr|A0A024RD80|A0A024RD80_HUMAN;tr|H0Y7A7|H0Y7A7_HUMAN;tr|K9JA46|K9JA46_HUMAN	K04079+K02183
Glycine, serine and threonine metabolism	3	ko00260	sp|O43175|SERA_HUMAN;sp|P32929|CGL_HUMAN;tr|B4DHQ3|B4DHQ3_HUMAN	K00058+K01758+K00831
Parkinson's disease	3	ko05012	tr|A0A024R9B7|A0A024R9B7_HUMAN;tr|Q4W5L2|Q4W5L2_HUMAN;tr|V9HWC2|V9HWC2_HUMAN	K02268+K04528+K05687
Insulin signaling pathway	3	ko04910	sp|P49327|FAS_HUMAN;tr|A0A024R7J0|A0A024R7J0_HUMAN;tr|H0Y7A7|H0Y7A7_HUMAN	K00665+K04345+K02183
MAPK signaling pathway	3	ko04010	sp|P51812|KS6A3_HUMAN;sp|Q9H3U1|UN45A_HUMAN;tr|A0A024R7J0|A0A024R7J0_HUMAN	K04373+K04460+K04345
Terpenoid backbone biosynthesis	3	ko00900	sp|P14324|FPPS_HUMAN;sp|Q9BWD1|THIC_HUMAN;tr|Q8N995|Q8N995_HUMAN	K00787+K00626+K01641
Alzheimer's disease	3	ko05010	tr|A0A024R9B7|A0A024R9B7_HUMAN;tr|H0Y7A7|H0Y7A7_HUMAN;tr|Q4W5L2|Q4W5L2_HUMAN	K02268+K02183+K04528
DNA replication	3	ko03030	sp|P12004|PCNA_HUMAN;sp|P49736|MCM2_HUMAN;tr|Q6FHX6|Q6FHX6_HUMAN	K04802+K02540+K04799
Alanine, aspartate and glutamate metabolism	3	ko00250	sp|P17174|AATC_HUMAN;tr|A8YXX4|A8YXX4_HUMAN;tr|Q5T6L4|Q5T6L4_HUMAN	K00813+K01915+K01940
Proteasome	3	ko03050	sp|P25789|PSA4_HUMAN;sp|Q06323|PSME1_HUMAN;tr|Q86SZ7|Q86SZ7_HUMAN	K02728+K06696+K06697
Long-term potentiation	3	ko04720	sp|P51812|KS6A3_HUMAN;tr|A0A024R7J0|A0A024R7J0_HUMAN;tr|H0Y7A7|H0Y7A7_HUMAN	K04373+K04345+K02183
Ubiquitin mediated proteolysis	3	ko04120	sp|Q13619|CUL4A_HUMAN;sp|Q9H9B4|SFXN1_HUMAN;tr|A0A0A0MS41|A0A0A0MS41_HUMAN	K10609+K03351
Peroxisome	2	ko04146	sp|Q06830|PRDX1_HUMAN;sp|Q6YN16|HSDL2_HUMAN	K13279+K08764
Bacterial invasion of epithelial cells	2	ko05100	sp|P50570|DYN2_HUMAN;tr|A0A024QZN4|A0A024QZN4_HUMAN	K01528+K05700
Melanogenesis	2	ko04916	tr|A0A024R7J0|A0A024R7J0_HUMAN;tr|H0Y7A7|H0Y7A7_HUMAN	K04345+K02183
Calcium signaling pathway	2	ko04020	tr|A0A024R7J0|A0A024R7J0_HUMAN;tr|H0Y7A7|H0Y7A7_HUMAN	K04345+K02183
Vascular smooth muscle contraction	2	ko04270	tr|A0A024R7J0|A0A024R7J0_HUMAN;tr|H0Y7A7|H0Y7A7_HUMAN	K04345+K02183
Leukocyte transendothelial migration	2	ko04670	tr|A0A024QZN4|A0A024QZN4_HUMAN;tr|A0A024R0V4|A0A024R0V4_HUMAN	K05700+K06274
NOD-like receptor signaling pathway	2	ko04621	tr|A0A024RD80|A0A024RD80_HUMAN;tr|K9JA46|K9JA46_HUMAN	K04079
Tryptophan metabolism	2	ko00380	sp|Q9BWD1|THIC_HUMAN;tr|A0A024R6K8|A0A024R6K8_HUMAN	K00626+K01867
Nucleotide excision repair	2	ko03420	sp|P12004|PCNA_HUMAN;sp|Q13619|CUL4A_HUMAN	K04802+K10609
Galactose metabolism	2	ko00052	sp|P36871|PGM1_HUMAN;tr|A0A024R7A8|A0A024R7A8_HUMAN	K01835+K00011
Pathways in cancer	2	ko05200	tr|A0A024RD80|A0A024RD80_HUMAN;tr|K9JA46|K9JA46_HUMAN	K04079
Valine, leucine and isoleucine degradation	2	ko00280	sp|Q9BWD1|THIC_HUMAN;tr|Q8N995|Q8N995_HUMAN	K00626+K01641
Gastric acid secretion	2	ko04971	tr|A0A024R7J0|A0A024R7J0_HUMAN;tr|H0Y7A7|H0Y7A7_HUMAN	K04345+K02183
Two-component system	2	ko02020	sp|Q9BWD1|THIC_HUMAN;tr|A8YXX4|A8YXX4_HUMAN	K00626+K01915
Phagosome	2	ko04145	sp|P02786|TFR1_HUMAN;sp|P51149|RAB7A_HUMAN	K06503+K07897
Fc gamma R-mediated phagocytosis	2	ko04666	sp|P50570|DYN2_HUMAN;tr|A0A024R0V4|A0A024R0V4_HUMAN	K01528+K06274
Starch and sucrose metabolism	2	ko00500	sp|P36871|PGM1_HUMAN;tr|A0A0A0MTS2|A0A0A0MTS2_HUMAN	K01835+K01810
Prostate cancer	2	ko05215	tr|A0A024RD80|A0A024RD80_HUMAN;tr|K9JA46|K9JA46_HUMAN	K04079
Salivary secretion	2	ko04970	tr|A0A024R7J0|A0A024R7J0_HUMAN;tr|H0Y7A7|H0Y7A7_HUMAN	K04345+K02183
GnRH signaling pathway	2	ko04912	tr|A0A024R7J0|A0A024R7J0_HUMAN;tr|H0Y7A7|H0Y7A7_HUMAN	K04345+K02183
Huntington's disease	2	ko05016	tr|A0A024R9B7|A0A024R9B7_HUMAN;tr|E9PFW3|E9PFW3_HUMAN	K02268+K11826
Wnt signaling pathway	2	ko04310	tr|A0A024R7J0|A0A024R7J0_HUMAN;tr|A0A024R904|A0A024R904_HUMAN	K04345+K04507
Butanoate metabolism	2	ko00650	sp|Q9BWD1|THIC_HUMAN;tr|Q8N995|Q8N995_HUMAN	K00626+K01641
Shigellosis	2	ko05131	tr|A0A024QZN4|A0A024QZN4_HUMAN;tr|E9PEZ3|E9PEZ3_HUMAN	K05700+K05740
Nitrogen metabolism	2	ko00910	sp|P32929|CGL_HUMAN;tr|A8YXX4|A8YXX4_HUMAN	K01758+K01915
Vasopressin-regulated water reabsorption	2	ko04962	tr|A0A024R7J0|A0A024R7J0_HUMAN;tr|J3QQX2|J3QQX2_HUMAN	K04345+K12462
Prion diseases	2	ko05020	tr|A0A024R7J0|A0A024R7J0_HUMAN;tr|V9HW72|V9HW72_HUMAN	K04345+K09553
Citrate cycle (TCA cycle)	2	ko00020	tr|A0A024R1T9|A0A024R1T9_HUMAN;tr|V9HWF2|V9HWF2_HUMAN	K01648+K00025
Phenylalanine metabolism	2	ko00360	sp|P17174|AATC_HUMAN;tr|V9HWC7|V9HWC7_HUMAN	K00813+K11188
Synthesis and degradation of ketone bodies	2	ko00072	sp|Q9BWD1|THIC_HUMAN;tr|Q8N995|Q8N995_HUMAN	K00626+K01641
Pyrimidine metabolism	2	ko00240	sp|Q16881|TRXR1_HUMAN;tr|Q32Q12|Q32Q12_HUMAN	K00384+K00940
Olfactory transduction	2	ko04740	tr|A0A024R7J0|A0A024R7J0_HUMAN;tr|H0Y7A7|H0Y7A7_HUMAN	K04345+K02183
RNA degradation	2	ko03018	sp|P26196|DDX6_HUMAN;tr|A0A024R4F1|A0A024R4F1_HUMAN	K12614+K01689
Fatty acid biosynthesis	1	ko00061	sp|P49327|FAS_HUMAN	K00665
Gap junction	1	ko04540	tr|A0A024R7J0|A0A024R7J0_HUMAN	K04345
Drug metabolism - other enzymes	1	ko00983	tr|Q6LET3|Q6LET3_HUMAN	K00760
PPAR signaling pathway	1	ko03320	sp|Q6YN16|HSDL2_HUMAN	K08764
Systemic lupus erythematosus	1	ko05322	sp|Q6PKG0|LARP1_HUMAN	K11090
Porphyrin and chlorophyll metabolism	1	ko00860	sp|P53004|BIEA_HUMAN	K00214
Selenoamino acid metabolism	1	ko00450	sp|P32929|CGL_HUMAN	K01758
Bile secretion	1	ko04976	tr|A0A024R7J0|A0A024R7J0_HUMAN	K04345
Primary bile acid biosynthesis	1	ko00120	sp|Q6YN16|HSDL2_HUMAN	K08764
Chemokine signaling pathway	1	ko04062	tr|A0A024R7J0|A0A024R7J0_HUMAN	K04345
Basal transcription factors	1	ko03022	tr|X5D2J9|X5D2J9_HUMAN	K03121
Metabolism of xenobiotics by cytochrome P450	1	ko00980	tr|Q6FGJ9|Q6FGJ9_HUMAN	K00799
Hedgehog signaling pathway	1	ko04340	tr|A0A024R7J0|A0A024R7J0_HUMAN	K04345
Isoquinoline alkaloid biosynthesis	1	ko00950	sp|P17174|AATC_HUMAN	K00813
Phosphatidylinositol signaling system	1	ko04070	tr|H0Y7A7|H0Y7A7_HUMAN	K02183
Steroid biosynthesis	1	ko00100	sp|Q16850|CP51A_HUMAN	K05917
Vibrio cholerae infection	1	ko05110	tr|A0A024R7J0|A0A024R7J0_HUMAN	K04345
Cardiac muscle contraction	1	ko04260	tr|A0A024R9B7|A0A024R9B7_HUMAN	K02268
Phototransduction	1	ko04744	tr|H0Y7A7|H0Y7A7_HUMAN	K02183
p53 signaling pathway	1	ko04115	sp|P31947|1433S_HUMAN	K06644
Streptomycin biosynthesis	1	ko00521	sp|P36871|PGM1_HUMAN	K01835
Pentose and glucuronate interconversions	1	ko00040	tr|A0A024R7A8|A0A024R7A8_HUMAN	K00011
Drug metabolism - cytochrome P450	1	ko00982	tr|Q6FGJ9|Q6FGJ9_HUMAN	K00799
Tyrosine metabolism	1	ko00350	sp|P17174|AATC_HUMAN	K00813
Aldosterone-regulated sodium reabsorption	1	ko04960	sp|P31947|1433S_HUMAN	K06644
Benzoate degradation	1	ko00362	sp|Q9BWD1|THIC_HUMAN	K00626
mTOR signaling pathway	1	ko04150	sp|P51812|KS6A3_HUMAN	K04373
Glyoxylate and dicarboxylate metabolism	1	ko00630	tr|V9HWF2|V9HWF2_HUMAN	K00025
Mismatch repair	1	ko03430	sp|P12004|PCNA_HUMAN	K04802
Viral myocarditis	1	ko05416	sp|P78344|IF4G2_HUMAN	K03260
Lysine degradation	1	ko00310	sp|Q9BWD1|THIC_HUMAN	K00626
Tropane, piperidine and pyridine alkaloid biosynthesis	1	ko00960	sp|P17174|AATC_HUMAN	K00813
Oxidative phosphorylation	1	ko00190	tr|A0A024R9B7|A0A024R9B7_HUMAN	K02268
Inositol phosphate metabolism	1	ko00562	sp|P60174|TPIS_HUMAN	K01803
Hematopoietic cell lineage	1	ko04640	sp|P02786|TFR1_HUMAN	K06503
Ether lipid metabolism	1	ko00565	tr|E9KL35|E9KL35_HUMAN	K01062
Fatty acid metabolism	1	ko00071	sp|Q9BWD1|THIC_HUMAN	K00626
Phenylalanine, tyrosine and tryptophan biosynthesis	1	ko00400	sp|P17174|AATC_HUMAN	K00813
Phenylpropanoid biosynthesis	1	ko00940	tr|V9HWC7|V9HWC7_HUMAN	K11188
Type II diabetes mellitus	1	ko04930	tr|V9HWB8|V9HWB8_HUMAN	K00873
Dilated cardiomyopathy	1	ko05414	tr|A0A024R7J0|A0A024R7J0_HUMAN	K04345
Biosynthesis of ansamycins	1	ko01051	tr|V9HWD9|V9HWD9_HUMAN	K00615
Glycerolipid metabolism	1	ko00561	tr|A0A024R7A8|A0A024R7A8_HUMAN	K00011
Non-homologous end-joining	1	ko03450	tr|Q6FHX6|Q6FHX6_HUMAN	K04799
Apoptosis	1	ko04210	tr|A0A024R7J0|A0A024R7J0_HUMAN	K04345
Reductive carboxylate cycle (CO2 fixation)	1	ko00720	tr|A0A024R1T9|A0A024R1T9_HUMAN	K01648
Amyotrophic lateral sclerosis (ALS)	1	ko05014	tr|A0A024R0P9|A0A024R0P9_HUMAN	K11518
Phototransduction - fly	1	ko04745	tr|H0Y7A7|H0Y7A7_HUMAN	K02183
Proximal tubule bicarbonate reclamation	1	ko04964	tr|V9HWF2|V9HWF2_HUMAN	K00025
One carbon pool by folate	1	ko00670	tr|Q59HH3|Q59HH3_HUMAN	K11787
Taste transduction	1	ko04742	tr|A0A024R7J0|A0A024R7J0_HUMAN	K04345
Valine, leucine and isoleucine biosynthesis	1	ko00290	tr|A0A024RCN6|A0A024RCN6_HUMAN	K01873
Glioma	1	ko05214	tr|H0Y7A7|H0Y7A7_HUMAN	K02183
Vitamin B6 metabolism	1	ko00750	tr|B4DHQ3|B4DHQ3_HUMAN	K00831
Novobiocin biosynthesis	1	ko00401	sp|P17174|AATC_HUMAN	K00813
Adherens junction	1	ko04520	tr|A0A024QZN4|A0A024QZN4_HUMAN	K05700
